# Supplementary material for: Ketogenic Diet and Multiple Health Outcomes: An Umbrella Review of Meta-Analysis
Source: MDPI journal article supplement (doi:10.3390/nu15194161), 2023-09-27
Supplement: s1 [file s1]

**Supplementary methods.** Search strategy for PubMed, Embase, and the Cochrane Database of Systematic Reviews

Search strategy for PubMed.

| No. | Description or domain                            | Search term                                                                                                                                                                |
|-----|--------------------------------------------------|----------------------------------------------------------------------------------------------------------------------------------------------------------------------------|
| 1   | Search terms for ketogenic diet (title/abstract) | "ketogenic diet" OR "very low-carbohydrate diet, keto-adaptation" OR ketosis OR "high fat diet" OR "low carbohydrate diet" OR "carbohydrate-restricted diet" OR VLCD OR KD |
| 2   | MeSH terms for unsaturated fatty acids           | "Diet, Ketogenic"[Mesh]                                                                                                                                                    |
| 3   | Search terms for meta-analyses (title/abstract)  | meta-analy* OR meta analy* OR metaanaly* OR meta-regression OR meta synthesis                                                                                              |
| 4   | MeSH terms for meta-analyses                     | Meta-Analysis[Publication Type] OR "Meta-Analysis as Topic"[Mesh]                                                                                                          |
| 5   | Domain for ketogenic diet                        | 1 OR 2                                                                                                                                                                     |
| 6   | Domain for meta-analyses                         | 3 OR 4                                                                                                                                                                     |
| 7   | Total search string                              | 5 AND 6                                                                                                                                                                    |

Search strategy for Embase.

| No. | Description or domain                                                  | Search term                                                                                                                                                                |
|-----|------------------------------------------------------------------------|----------------------------------------------------------------------------------------------------------------------------------------------------------------------------|
| 1   | Search terms for ketogenic diet (title, abstract, and author keywords) | "ketogenic diet" OR "very low-carbohydrate diet, keto-adaptation" OR ketosis OR "high fat diet" OR "low carbohydrate diet" OR "carbohydrate-restricted diet" OR VLCD OR KD |
| 2   | MeSH terms for ketogenic diet                                          | 'Diet, Ketogenic'/exp                                                                                                                                                      |
| 3   | Search terms for meta-analyses (title, abstract, and author keywords)  | meta-analy* OR meta analy* OR metaanaly* OR meta-regression OR meta synthesis                                                                                              |
| 4   | MeSH terms for meta-analyses                                           | 'meta analysis'/exp                                                                                                                                                        |
| 5   | Domain for unsaturated fatty acids                                     | 1 OR 2                                                                                                                                                                     |
| 6   | Domain for meta-analyses                                               | 3 OR 4                                                                                                                                                                     |
| 7   | Total search string                                                    | 5 AND 6                                                                                                                                                                    |

Search strategy for The Cochrane Database of Reviews.

| No. | Description or domain | Search term |
|-----|-----------------------|-------------|
|-----|-----------------------|-------------|

|   |                                                            |                                                                                                                                                                            |
|---|------------------------------------------------------------|----------------------------------------------------------------------------------------------------------------------------------------------------------------------------|
| 1 | Search terms for ketogenic diet (title, abstract, keyword) | "ketogenic diet" OR "very low-carbohydrate diet, keto-adaptation" OR ketosis OR "high fat diet" OR "low carbohydrate diet" OR "carbohydrate-restricted diet" OR VLCD OR KD |
| 2 | MeSH terms for ketogenic diet                              | "Diet, Ketogenic"[Mesh descriptor, explode all trees]                                                                                                                      |
| 3 | Search terms for meta-analyses (title, abstract, keyword)  | meta-analy* OR meta analy* OR metaanaly* OR meta-regression OR meta synthesis                                                                                              |
| 4 | MeSH terms for meta-analyses                               | "Meta-Analysis as Topic"[Mesh descriptor, explode all trees]                                                                                                               |
| 5 | Domain for ketogenic diet                                  | 1 OR 2                                                                                                                                                                     |
| 6 | Domain for meta-analyses                                   | 3 OR 4                                                                                                                                                                     |
| 7 | Total search string                                        | 5 AND 6                                                                                                                                                                    |



Supplemental Table S1 Quantitative synthesis and evidence grading for meta-analyses of diet intervention for clinical and non-clinical health problems

| Study, year<br>(ref )         | Study<br>disease or<br>population | Interventi<br>on                | Outcomes                 | No. of<br>studies<br>(partici<br>pants,<br>n) | Origi<br>nal<br>effect<br>metri<br>cs | Random-effects<br>summary estimate<br>(95% CI) | Rand<br>om-<br>effects<br><i>P</i> | <i>I</i> <sup>2</sup> ,<br>% | 95% Prediction<br>interval | Egger<br>'s<br>test><br><i>P</i> | Largest study<br>estimate<br>(95% CI) | Significant<br>studies | O/E  | <i>P</i> | Gradi<br>ng |
|-------------------------------|-----------------------------------|---------------------------------|--------------------------|-----------------------------------------------|---------------------------------------|------------------------------------------------|------------------------------------|------------------------------|----------------------------|----------------------------------|---------------------------------------|------------------------|------|----------|-------------|
| Castellana et<br>al. 2020 [1] | Overweight,<br>obese              | Ketogenic<br>phase < 4<br>weeks | Body weight              | 6 (384)                                       | MD                                    | -1.698 (-10.314,6.917)                         | 0.699                              | 0.0                          | (-13.903,10.506)           | 0.017                            | -1.45 (-13.04,10.13)                  | 0/5.58                 | -    |          | NS          |
|                               |                                   | Ketogenic<br>phase≥ 4<br>weeks  | Body weight              | 6 (211)                                       | MD                                    | -2.962 (-13.979,8.054)                         | 0.598                              | 0.0                          | (-18.568,12.643)           | 0.019                            | -1.77 (-17.72,14.18)                  | 0/5.62                 | -    |          | NS          |
|                               |                                   | VLCKD                           | Body weight              | 3 (222)                                       | MD                                    | -0.803 (-11.434,9.829)                         | 0.882                              | 0.0                          | (-69.726,68.12)            | 0.095                            | -0.54 (-15.61,14.54)                  | 0/0.71                 | -    |          | NS          |
|                               |                                   | Ketogenic<br>phase < 4<br>weeks | BMI                      | 5 (312)                                       | MD                                    | -2.133 (-12.617,8.351)                         | 0.690                              | 0.0                          | (-19.157,14.89)            | 0.038                            | -2 (-15.88,11.87)                     | 0/4.88                 | -    |          | NS          |
|                               |                                   | Ketogenic<br>phase≥4<br>weeks   | BMI                      | 5 (145)                                       | MD                                    | -3.588 (-18.241,11.065)                        | 0.631                              | 0.0                          | (-27.381,20.205)           | 0.006                            | -2.08 (-19.72,15.56)                  | 0/4.87                 | -    |          | NS          |
|                               |                                   | Ketogenic<br>phase 4<br>weeks   | WC                       | 5 (312)                                       | MD                                    | -1.779 (-11.744,8.187)                         | 0.726                              | 0.0                          | (-17.96,14.403)            | 0.009                            | -1.48 (-13.17,10.21)                  | 0/4.6                  | -    |          | NS          |
|                               |                                   | Ketogenic<br>phase 4<br>weeks   | WC                       | 5 (145)                                       | MD                                    | -4.057 (-18.704,10.590)                        | 0.587                              | 0.0                          | (-27.84,19.726)            | 0.014                            | -2.53 (-22.82,17.75)                  | 0/4.98                 | -    |          | NS          |
|                               |                                   | VLCKD                           | RR of<br>discontinuation | 3 (222)                                       | RR                                    | 0.955 (0.610,1.495)                            | 0.841                              | 0.0                          | (0.052,17.408)             | 0.885                            | 1.03 (0.62,1.7)                       | 0/0.15                 | -    |          | NS          |
| Choi et al.<br>2020 [2]       | Overweight<br>or obese,           | KD                              | BMI                      | 2 (73)                                        | SMD                                   | -0.803 (-3.243,1.636)                          | 0.519                              | 94.8                         | -                          | 0.000                            | 0.42 (-0.23,1.06)                     | 1/0.21                 | 0.20 |          | NS          |

|                            |                                      |                |    |                          |         |     |                        |       |      |                  |       |                     |        |      |      |
|----------------------------|--------------------------------------|----------------|----|--------------------------|---------|-----|------------------------|-------|------|------------------|-------|---------------------|--------|------|------|
| Muscogiuri et al. 2021 [3] | non-type 2 diabetes                  |                | KD | Body weight              | 3 (219) | SMD | -0.532 (-1.627,0.563)  | 0.341 | 89.9 | (-14.081,13.017) | 0.658 | -0.14 (-0.46,0.19)  | 1/0.19 | 0.18 | NS   |
|                            |                                      |                | KD | Diastolic blood pressure | 2 (184) | SMD | -0.288 (-0.996,0.420)  | 0.425 | 74.5 | -                | 0.000 | -0.6 (-0.94,-0.27)  | 1/0.68 | 1.00 | NS   |
|                            |                                      |                | KD | Fasting glucose          | 6 (290) | SMD | -0.348 (-0.764,0.069)  | 0.102 | 54.6 | (-1.528,0.833)   | 0.425 | -0.27 (-0.6,0.05)   | 1/0.48 | 0.39 | NS   |
|                            |                                      |                | KD | Fasting insulin          | 3 (200) | SMD | -0.150 (-0.985,0.684)  | 0.724 | 79.9 | (-9.968,9.667)   | 0.934 | -0.19 (-0.51,0.14)  | 2/0.21 | 0.01 | NS   |
|                            |                                      |                | KD | HDL                      | 4 (235) | SMD | 0.067 (-0.389,0.522)   | 0.774 | 52.4 | (-1.672,1.805)   | 0.786 | 0.04 (-0.28,0.37)   | 0/0.2  | -    | NS   |
|                            |                                      |                | KD | LDL                      | 4 (235) | SMD | 0.349 (0.087,0.610)    | 0.009 | 0.0  | (-0.225,0.922)   | 0.228 | 0.25 (-0.08,0.57)   | 0/0.33 | -    | Weak |
|                            |                                      |                | KD | Serum creatinine         | 3 (223) | SMD | 0.244 (-0.208,0.697)   | 0.290 | 52.5 | (-4.481,4.969)   | 0.578 | 0.07 (-0.26,0.39)   | 1/0.16 | 0.15 | NS   |
|                            |                                      |                | KD | Systolic blood pressure  | 2 (184) | SMD | -0.331 (-1.069,0.406)  | 0.379 | 76.6 | -                | 0.000 | -0.66 (-0.99,-0.33) | 1/0.78 | 1.00 | NS   |
|                            |                                      |                | KD | TC                       | 4 (235) | SMD | 0.381 (0.083,0.679)    | 0.012 | 11.6 | (-0.435,1.197)   | 0.256 | 0.18 (-0.15,0.5)    | 2/0.27 | 0.02 | Weak |
|                            |                                      |                | KD | TG                       | 4 (235) | SMD | -0.175 (-0.458,0.109)  | 0.227 | 57.9 | (-1.266,0.917)   | 0.029 | -0.4 (0.02,0.24)    | 1/0.53 | 0.44 | NS   |
|                            |                                      |                | KD | WC                       | 3 (219) | SMD | -0.700 (-1.847,0.447)  | 0.232 | 90.5 | (-14.912,13.513) | 0.584 | -0.19 (-0.52,0.13)  | 1/0.22 | 0.20 | NS   |
|                            | Overweight or obese, type 2 diabetes |                | KD | C-reactive protein       | 3 (183) | SMD | 0.081 (-0.209,0.371)   | 0.585 | 0.0  | (-1.799,1.96)    | 0.939 | 0.09 (-0.27,0.46)   | 0/0.16 | -    | NS   |
|                            |                                      |                | KD | Diastolic blood pressure | 4 (233) | SMD | 0.007 (-0.263,0.278)   | 0.958 | 0.0  | (-0.586,0.601)   | 0.564 | 0.09 (-0.28,0.45)   | 0/0.22 | -    | NS   |
|                            |                                      |                | KD | Systolic blood pressure  | 4 (233) | SMD | 0.058 (-0.200,0.317)   | 0.657 | 0.0  | (-0.508,0.625)   | 0.920 | 0.08 (-0.29,0.44)   | 0/0.21 | -    | NS   |
|                            | Obesity                              | VLCKD(control) |    | BMI                      | 9 (210) | MD  | -7.037 (-20.076,6.003) | 0.290 | 0.0  | (-22.769,8.695)  | 0.094 | -7.61 (-36.11,20.9) | 0/9    | -    | NS   |

|  |                    |             |          |    |                        |       |     |                  |       |                      |        |   |    |
|--|--------------------|-------------|----------|----|------------------------|-------|-----|------------------|-------|----------------------|--------|---|----|
|  | VLCKD(c<br>ontrol) | Body weight | 10 (198) | MD | -3.031 (-8.810,2.747)  | 0.304 | 0.0 | (-9.83,3.767)    | 0.003 | -1.69 (-13.45,10.07) | 0/7.14 | - | NS |
|  | VLCKD(c<br>ontrol) | FFM         | 9 (242)  | MD | -0.415 (-3.380,2.550)  | 0.784 | 0.0 | (-3.992,3.162)   | 0.864 | -0.6 (-6.87,5.68)    | 0/1.82 | - | NS |
|  | VLCKD(c<br>ontrol) | FM          | 11 (271) | MD | -2.158 (-8.058,3.742)  | 0.473 | 0.0 | (-8.968,4.652)   | 0.047 | -0.56 (-9.43,8.31)   | 0/1.9  | - | NS |
|  | VLCKD(c<br>ontrol) | Glycemia    | 10 (275) | MD | -1.586 (-5.541,2.369)  | 0.432 | 0.0 | (-6.239,3.067)   | 0.025 | -1.49 (-9.51,6.54)   | 0/6.67 | - | NS |
|  | VLCKD(c<br>ontrol) | HDL         | 11 (323) | MD | 0.694 (-2.605,3.993)   | 0.680 | 0.0 | (-3.113,4.502)   | 0.168 | 0.36 (-7.17,7.9)     | 0/1.28 | - | NS |
|  | VLCKD(c<br>ontrol) | HOMA-IR     | 8 (183)  | MD | -2.575 (-8.194,3.045)  | 0.369 | 0.0 | (-9.591,4.441)   | 0.001 | -1.99 (-11.36,7.38)  | 0/6.37 | - | NS |
|  | VLCKD(c<br>ontrol) | HbA1c       | 5 (241)  | MD | -1.041 (-9.244,7.162)  | 0.804 | 0.0 | (-14.36,12.279)  | 0.065 | -0.06 (-10.25,10.13) | 0/0.26 | - | NS |
|  | VLCKD(c<br>ontrol) | LDL         | 11 (323) | MD | -0.898 (-4.037,2.242)  | 0.575 | 0.0 | (-4.521,2.726)   | 0.137 | -0.48 (-6.62,5.66)   | 0/1.84 | - | NS |
|  | VLCKD(c<br>ontrol) | TC          | 11 (323) | MD | -0.991 (-4.264,2.283)  | 0.553 | 0.0 | (-4.768,2.787)   | 0.002 | -0.23 (-6.18,5.71)   | 0/0.85 | - | NS |
|  | VLCKD(c<br>ontrol) | TG          | 11 (324) | MD | -2.110 (-6.723,2.504)  | 0.370 | 0.0 | (-7.435,3.216)   | 0.098 | -2.09 (-11.76,7.58)  | 0/9.61 | - | NS |
|  | VLCKD(c<br>ontrol) | WC          | 11 (239) | MD | -3.575 (-10.082,2.933) | 0.282 | 0.0 | (-11.086,3.937)  | 0.001 | -1.96 (-11.26,7.33)  | 0/8.81 | - | NS |
|  | VLCKD              | BMI         | 5 (394)  | MD | -0.256 (-8.439,7.927)  | 0.951 | 0.0 | (-13.543,13.031) | 0.007 | -0.03 (-8.35,8.28)   | 0/0.25 | - | NS |
|  | VLCKD              | Body weight | 6 (426)  | MD | -1.424 (-10.128,7.280) | 0.748 | 0.0 | (-13.754,10.906) | 0.007 | -0.98 (-10.89,8.94)  | 0/3.15 | - | NS |
|  | VLCKD              | FFM         | 3 (127)  | MD | 1.749 (-13.059,16.557) | 0.817 | 0.0 | (-94.249,97.747) | 0.833 | 2.89 (-15.16,20.94)  | 0/2.89 | - | NS |
|  | VLCKD              | FM          | 3 (127)  | MD | -0.087 (-8.371,8.197)  | 0.984 | 0.0 | (-53.794,53.62)  | 0.015 | 0.01 (-8.3,8.33)     | 0/0.15 | - | NS |

|                          |                       |        |                     |          |     |                            |       |      |                    |       |                         |        |      |      |
|--------------------------|-----------------------|--------|---------------------|----------|-----|----------------------------|-------|------|--------------------|-------|-------------------------|--------|------|------|
| Cao et al.<br>2021 [4]   | Endurance<br>athletes | VLCKD  | Glycemia            | 3 (198)  | MD  | 0.251 (-21.008,21.509)     | 0.982 | 0.0  | (-137.566,138.067) | 0.217 | 1.87 (-22.16,25.9)      | 0/2.92 | -    | NS   |
|                          |                       | VLCKD  | HDL                 | 3 (198)  | MD  | 3.302 (-19.661,26.264)     | 0.778 | 0.0  | (-145.562,152.165) | 0.348 | 3.1 (-31.71,37.91)      | 0/3    | -    | NS   |
|                          |                       | VLCKD  | HOMA-IR             | 2 (145)  | MD  | -16.806 (-151.859,118.247) | 0.807 | 0.0  | -                  | 0.000 | -17.42 (-195.46,160.62) | 0/2    | -    | NS   |
|                          |                       | VLCKD  | HbA1c               | 3 (198)  | MD  | 1.160 (-27.578,29.899)     | 0.937 | 0.0  | (-185.149,187.47)  | 0.138 | 2.61 (-27.78,33)        | 0/3    | -    | NS   |
|                          |                       | VLCKD  | LDL                 | 3 (198)  | MD  | -0.855 (-16.710,15.001)    | 0.916 | 0.0  | (-103.644,101.935) | 0.090 | 0.36 (-18.5,19.22)      | 0/0.37 | -    | NS   |
|                          |                       | VLCKD  | TC                  | 3 (198)  | MD  | -3.245 (-25.569,19.079)    | 0.776 | 0.0  | (-147.972,141.482) | 0.522 | -3.31 (-40.08,33.46)    | 0/3    | -    | NS   |
|                          |                       | VLCKD  | TG                  | 3 (198)  | MD  | -7.423 (-55.623,40.778)    | 0.763 | 0.0  | (-319.9,305.055)   | 0.343 | -7.28 (-80.72,66.15)    | 0/3    | -    | NS   |
|                          |                       | VLCKD  | WC                  | 4 (216)  | MD  | -4.237 (-24.936,16.462)    | 0.688 | 0.0  | (-49.678,41.203)   | 0.006 | -3.61 (-25.28,18.06)    | 0/3.98 | -    | NS   |
|                          | CV risk<br>factor     | K-LCHF | HRmax               | 8 (128)  | SMD | 0.140 (-0.352,0.632)       | 0.577 | 52.3 | (-1.255,1.535)     | 0.798 | 0.74 (-0.09,1.57)       | 1/1.03 | -    | NS   |
|                          |                       | K-LCHF | RER                 | 8 (135)  | SMD | -1.811 (-2.492,-1.13)      | 0.000 | 58.7 | (-3.805,0.183)     | 0.023 | -1.57 (-2.51,-0.64)     | 6/3.08 | 0.06 | Weak |
|                          |                       | K-LCHF | RPE                 | 6 (112)  | SMD | 0.138 (-0.582,0.859)       | 0.707 | 70.2 | (-2.186,2.462)     | 0.133 | -1.08 (-1.95,-0.22)     | 2/1.38 | 0.63 | NS   |
|                          |                       | K-LCHF | TTE                 | 3 (48)   | SMD | -0.126 (-0.658,0.406)      | 0.643 | 0.0  | (-3.575,3.323)     | 0.250 | 0.04 (-0.76,0.84)       | 0/0.15 | -    | NS   |
|                          |                       | K-LCHF | VO <sub>2</sub> max | 10 (141) | SMD | -0.056 (-0.357,0.245)      | 0.716 | 0.0  | (-0.41,0.299)      | 0.377 | -0.07 (-0.87,0.73)      | 0/0.51 | -    | NS   |
| Bueno et al.<br>2013 [5] | Healthy<br>people     | VLCKD  | Body weight         | 5 (588)  | MD  | -0.373 (-9.6,8.853)        | 0.937 | 0.0  | (-15.355,14.609)   | 0.451 | -0.49 (-13.05,12.07)    | 0/1.53 | -    | NS   |
|                          |                       | VLCKD  | DBP                 | 4 (397)  | MD  | 0.193 (-9.148,9.535)       | 0.968 | 0.0  | (-20.315,20.701)   | 0.158 | 0.25 (-11.85,12.35)     | 0/0.42 | -    | NS   |
|                          |                       | VLCKD  | HDL                 | 4 (355)  | MD  | 0.555 (-9.658,10.768)      | 0.915 | 0.0  | (-21.866,22.976)   | 0.059 | 0 (-11.93,11.93)        | 0/0.2  | -    | NS   |
|                          |                       | VLCKD  | LDL                 | 4 (355)  | MD  | 0.362 (-9.09,9.813)        | 0.940 | 0.0  | (-20.387,21.111)   | 0.436 | 0 (-11.93,11.93)        | 0/0.2  | -    | NS   |
|                          |                       | VLCKD  | SBP                 | 4 (397)  | MD  | -0.320 (-9.528,8.888)      | 0.946 | 0.0  | (-20.535,19.895)   | 0.281 | -1.13 (-16.1,13.83)     | 0/2.95 | -    | NS   |
|                          |                       | VLCKD  | TG                  | 4 (355)  | MD  | -1.055 (-11.486,9.377)     | 0.843 | 0.0  | (-23.955,21.846)   | 0.405 | -1.11 (-15.95,13.74)    | 0/2.88 | -    | NS   |
|                          | Healthy<br>people     | VLCKD  | Body weight         | 5 (562)  | MD  | -0.504 (-7.132,6.123)      | 0.881 | 0.0  | (-11.266,10.257)   | 0.283 | -0.4 (-9.01,8.21)       | 0/1.06 | -    | NS   |
|                          |                       | VLCKD  | DBP                 | 5 (658)  | MD  | 0.073 (-9.107,9.254)       | 0.988 | 0.0  | (-14.833,14.98)    | 0.268 | -0.34 (-14.3,13.61)     | 0/0.94 | -    | NS   |
|                          |                       | VLCKD  | HDL                 | 5 (639)  | MD  | 2.416 (-13.579,18.411)     | 0.767 | 0.0  | (-23.555,28.388)   | 0.110 | 1.96 (-20.93,24.85)     | 0/4.94 | -    | NS   |
|                          |                       | VLCKD  | LDL                 | 5 (639)  | MD  | 0.679 (-8.963,10.321)      | 0.890 | 0.0  | (-14.977,16.335)   | 0.125 | 0 (-13.58,13.58)        | 0/0.25 | -    | NS   |

|                                                        |                                |                  |                                   |         |     |                         |            |      |                  |       |                      |        |      |      |
|--------------------------------------------------------|--------------------------------|------------------|-----------------------------------|---------|-----|-------------------------|------------|------|------------------|-------|----------------------|--------|------|------|
| Gibson et al.<br>2015 [6]                              | Type 2<br>Diabetes<br>Mellitus | VLCKD            | SBP                               | 5 (605) | MD  | -0.285 (-7.715,7.144)   | 0.940      | 0.0  | (-12.348,11.778) | 0.285 | -0.27 (-10.65,10.1)  | 0/0.66 | -    | NS   |
|                                                        |                                | VLCKD            | TG                                | 5 (639) | MD  | -1.224 (-12.794,10.345) | 0.836      | 0.0  | (-20.01,17.562)  | 0.498 | -0.87 (-16.73,14.99) | 0/3.22 | -    | NS   |
|                                                        |                                | VLCKD            | DBP                               | 2 (243) | MD  | 0.766 (-18.777,20.309)  | 0.939      | 0    | -                | 0.000 | 0.16 (-23.68,24)     | 0/0.15 | -    | NS   |
|                                                        |                                | VLCKD            | SBP                               | 2 (243) | MD  | 0.403 (-21.668,22.474)  | 0.971      | 0    | -                | 0.000 | 0.99 (-22.71,24.7)   | 0/1.69 | -    | NS   |
|                                                        |                                | VLCKD            | TG                                | 3 (264) | MD  | -0.676 (-9.425,8.072)   | 0.880      | 0    | (-57.393,56.04)  | 0.255 | -0.63 (-10.80,9.53)  | 0/1.07 | -    | NS   |
|                                                        | -                              | KD               | Desire to eat                     | 4 (112) | WMD | -0.569 (-6.793,5.656)   | 0.858      | 0.0  | (-14.233,13.095) | 0.306 | 0.23 (-10.27,10.73)  | 0/0.3  | -    | NS   |
|                                                        |                                | KD               | Fullness/Satiety                  | 4 (112) | WMD | 0.579 (-5.113,6.272)    | 0.842      | 0.0  | (-11.917,13.075) | 0.207 | 0.29 (-7.94,8.51)    | 0/0.35 | -    | NS   |
|                                                        |                                | KD               | Hunger                            | 5 (246) | WMD | -0.645 (-6.247,4.958)   | 0.822      | 0.0  | (-9.742,8.452)   | 0.394 | -0.09 (-10.48,10.3)  | 0/0.28 | -    | NS   |
|                                                        |                                | KD               | Prospective<br>consumption        | 2 (67)  | WMD | -0.109 (-8.084,7.866)   | 0.979      | 0.0  | -                | 0.000 | -0.24 (-10.74,10.27) | 0/0.16 | -    | NS   |
| Sourbron et<br>al. 2020 [7]<br>Yang et al.<br>2021 [8] | Pediatric<br>seizures          | KD and/or<br>MAD | ≥50% seizure<br>reduction         | 5 (374) | RR  | 4.776 (2.976,7.665)     | <<br>0.001 | 0.0  | (2.216,10.295)   | 0.401 | 4.51 (2.03,10.01)    | 5/4.44 | 1.00 | Weak |
|                                                        | Cancer                         | KD               | Fasting glucose                   | 4 (100) | SMD | -0.402 (-1.232,0.427)   | 0.342      | 82.3 | (-4.157,3.352)   | 0.185 | -1.49 (-2.06,-0.91)  | 1/2.53 | -    | NS   |
|                                                        |                                | KD               | Fasting insulin                   | 3 (90)  | SMD | 0.107 (-1.331,1.545)    | 0.884      | 89.1 | (-17.665,17.878) | 0.033 | -0.96 (-1.59,-0.32)  | 2/0.85 | 0.20 | NS   |
|                                                        |                                | KD               | HDL                               | 3 (91)  | SMD | -0.185 (-0.975,0.604)   | 0.646      | 69.2 | (-9.143,8.773)   | 0.370 | 0.49 (-0.12,1.1)     | 0/0.33 | -    | NS   |
|                                                        |                                | KD               | LDL                               | 3 (91)  | SMD | 0.211 (-0.206,0.629)    | 0.321      | 0.0  | (-2.497,2.92)    | 0.383 | 0.08 (-0.52,0.68)    | 0/0.15 | -    | NS   |
|                                                        |                                | KD               | TC                                | 3 (115) | SMD | 0.248 (-0.170,0.666)    | 0.245      | 0.0  | (-2.463,2.96)    | 0.168 | 0.11 (-0.49,0.71)    | 0/0.16 | -    | NS   |
|                                                        |                                | KD               | TG                                | 3 (91)  | SMD | 0.152 (-0.481,0.784)    | 0.638      | 53.0 | (-6.442,6.745)   | 0.445 | -0.35 (-0.95,0.26)   | 0/0.24 | -    | NS   |
|                                                        |                                | KD               | Adverse events                    | 2 (329) | RR  | 1.263 (0.301,5.302)     | 0.750      | 81.2 | -                | 0.000 | 0.65 (0.35,1.2)      | 0/0.65 | -    | NS   |
|                                                        |                                | KD               | Ketosis                           | 2 (62)  | RR  | 3.578 (1.361,9.404)     | 0.010      | 0.0  | -                | 0.000 | 5.65 (1.45,22.08)    | 1/1.37 | -    | Weak |
| Whittaker et<br>al. 2022 [9]                           | Healthy<br>adult males         | HP-KD            | Total<br>testosterone,<br>resting | 2 (19)  | SMD | -1.040 (-1.729,-0.351)  | 0.003      | 0.0  | -                | 0.000 | -1.23 (-2.21,-0.26)  | 1/0.53 | 0.46 | Weak |



|                                |                         |             |                                  |         |     |                        |         |       |                |       |                     |        |      |      |
|--------------------------------|-------------------------|-------------|----------------------------------|---------|-----|------------------------|---------|-------|----------------|-------|---------------------|--------|------|------|
| Martin-McGill et al. 2020 [10] | Drug-resistant epilepsy | KD≥3weeks   | Cortisol, resting                | 4 (54)  | SMD | -0.073 (-0.526,0.379)  | 0.751   | 11.0  | (-1.268,1.121) | 0.920 | -0.02 (-0.74,0.69)  | 0/0.2  | -    | NS   |
|                                |                         | KD≥3weeks   | Total testosterone, resting      | 5 (73)  | SMD | 0.049 (-0.332,0.430)   | 0.801   | 0.0   | (-0.57,0.668)  | 0.031 | 0.51 (-0.22,1.24)   | 0/0.47 | -    | NS   |
|                                |                         | KD < 3weeks | Cortisol, resting                | 8 (78)  | SMD | 0.278 (-0.053,0.609)   | 0.099   | 0.0   | (-0.135,0.692) | 0.946 | 0.18 (-0.56,0.93)   | 0/0.43 | -    | NS   |
|                                |                         | KD < 3weeks | Total testosterone, resting      | 2 (19)  | SMD | -1.040 (-1.729,-0.351) | 0.003   | 0.0   | -              | 0.000 | -1.23 (-2.21,-0.26) | 1/0.53 | 0.46 | Weak |
|                                |                         | MP- KD      | Total testosterone, resting      | 5 (73)  | SMD | 0.049 (-0.332,0.430)   | 0.801   | 0.0   | (-0.57,0.668)  | 0.031 | 0.51 (-0.22,1.24)   | 0/0.47 | -    | NS   |
|                                |                         | KD          | ≥50% seizure reduction: adults   | 2 (141) | RR  | 4.802 (0.344,67.046)   | 0.243   | 62.3  | -              | 0.000 | 1.54 (0.27,8.7)     | 1/0.33 | 0.31 | NS   |
|                                |                         | KD          | ≥50% seizure reduction: children | 4 (385) | RR  | 5.641 (3.392,9.38)     | < 0.001 | 0.0   | (1.847,17.225) | 0.638 | 4.51 (2.03,10.01)   | 4/3.81 | 1    | Weak |
|                                |                         | KD          | Seizure freedom: children        | 4 (385) | RR  | 2.721 (0.992,7.461)    | 0.052   | 0.0   | (0.297,24.917) | 0.431 | 2.93 (0.63,13.65)   | 0/3.14 | -    | NS   |
|                                |                         | KD          | Treatment withdrawal: children   | 5 (425) | RR  | 1.016 (0.695,1.486)    | 0.934   | 0.000 | (0.549,1.883)  | 0.071 | 0.81 (0.49,1.36)    | 0/0.41 | -    | NS   |

|                           |                                            |    |                           |         |     |                         |            |      |                  |       |                      |        |      |      |
|---------------------------|--------------------------------------------|----|---------------------------|---------|-----|-------------------------|------------|------|------------------|-------|----------------------|--------|------|------|
| Zhou et al.<br>2022 [11]  | Type 2<br>diabetes                         | KD | BMI                       | 7 (535) | MD  | -0.433 (-7.434,6.569)   | 0.904      | 0.0  | (-9.615,8.75)    | 0.220 | -0.33 (-12.73,12.07) | 0/0.84 | -    | NS   |
|                           |                                            | KD | Body weight               | 7 (445) | MD  | -0.861 (-7.790,6.067)   | 0.808      | 0.0  | (-9.948,8.226)   | 0.058 | -0.32 (-12.69,12.06) | 0/0.71 | -    | NS   |
|                           |                                            | KD | Fasting glucose           | 5 (399) | MD  | 0.057 (-0.242,0.356)    | 0.708      | 39.4 | (-0.758,0.873)   | 0.665 | 0.25 (-0.12,0.62)    | 0/0.47 | -    | NS   |
|                           |                                            | KD | Fasting insulin           | 5 (332) | MD  | -0.829 (-8.659,7.002)   | 0.836      | 0.0  | (-13.543,11.886) | 0.388 | -0.37 (-12.83,12.09) | 0/0.64 | -    | NS   |
|                           |                                            | KD | HDL                       | 7 (458) | MD  | 0.283 (0.098,0.468)     | 0.003      | 0.0  | (0.04,0.525)     | 0.935 | 0.47 (0.1,0.84)      | 1/1.25 | -    | Weak |
|                           |                                            | KD | HOMA-IR                   | 5 (367) | MD  | -0.787 (-8.899,7.325)   | 0.849      | 0.0  | (-13.959,12.385) | 0.205 | -0.36 (-12.81,12.09) | 0/0.68 | -    | NS   |
|                           |                                            | KD | HbA1c                     | 6 (343) | MD  | -1.581 (-10.104,6.942)  | 0.716      | 0.0  | (-13.654,10.493) | 0.584 | -1.25 (-16.84,14.34) | 0/3.87 | -    | NS   |
|                           |                                            | KD | LDL                       | 7 (458) | MD  | 0.102 (-0.082,0.285)    | 0.277      | 0.0  | (-0.139,0.342)   | 0.239 | 0.08 (-0.28,0.45)    | 0/0.37 | -    | NS   |
|                           |                                            | KD | TC                        | 4 (365) | MD  | 0.003 (-0.203,0.209)    | 0.978      | 0.0  | (-0.45,0.455)    | 0.821 | 0.07 (-0.29,0.44)    | 0/0.22 | -    | NS   |
|                           |                                            | KD | TG                        | 7 (458) | MD  | -0.367 (-0.553,-0.181)  | 0.000      | 0.0  | (-0.611,-0.123)  | 0.525 | -0.2 (-0.57,0.17)    | 1/0.51 | 0.41 | Weak |
|                           |                                            | KD | WC                        | 5 (467) | MD  | -0.775 (-11.063,9.513)  | 0.883      | 0.0  | (-17.479,15.929) | 0.022 | -0.42 (-17.19,16.35) | 0/0.93 | -    | NS   |
| Pizzo et al.<br>2022 [12] | Pediatric<br>seizure                       | KD | ≥50% seizure<br>reduction | 7 (413) | OR  | 4.641 (2.307,9.335)     | <<br>0.001 | 43.5 | (0.754,28.569)   | 0.448 | 8.31 (3.01,22.93)    | 5/6.81 | -    | Weak |
| Amini et al.<br>2022 [13] | Overweight                                 | KD | BMI                       | 5 (178) | WMD | -0.145 (-5.536,5.245)   | 0.958      | 0.0  | (-8.898,8.607)   | 0.070 | 0 (-8.11,8.11)       | 0/0.25 |      | NS   |
|                           |                                            | KD | Body weight               | 5 (178) | WMD | -0.623 (-7.008,5.761)   | 0.848      | 0.0  | (-10.99,9.744)   | 0.043 | 0 (-8.11,8.11)       | 0/0.25 | -    | NS   |
|                           |                                            | KD | FFM                       | 3 (143) | WMD | 0.081 (-6.958,7.121)    | 0.982      | 0.0  | (-45.555,45.717) | 0.687 | 0.15 (-8.89,9.2)     | 0/0.18 | -    | NS   |
|                           |                                            | KD | FM                        | 5 (178) | WMD | 0.019 (-5.855,5.893)    | 0.995      | 0.0  | (-9.519,9.557)   | 0.244 | 0.19 (-7.99,8.37)    | 0/0.3  | -    | NS   |
|                           |                                            | KD | WC                        | 2 (124) | WMD | -0.910 (-14.311,12.490) | 0.894      | 0.0  | -                | 0.000 | -0.57 (-16.81,15.67) | 0/0.46 | -    | NS   |
|                           | Obese<br>cardiovascul<br>ar risk<br>factor | KD | Body weight               | 3 (158) | WMD | -0.356 (-10.325,9.614)  | 0.944      | 0.0  | (-64.987,64.275) | 0.283 | 0.5 (-14.74,15.73)   | 0/0.49 | -    | NS   |

|                             |                                   |    |                            |          |     |                        |       |      |                  |       |                      |        |      |      |
|-----------------------------|-----------------------------------|----|----------------------------|----------|-----|------------------------|-------|------|------------------|-------|----------------------|--------|------|------|
| Taftian et al.<br>2022 [14] | Overweight,<br>hyperlipide<br>mic | KD | Body weight                | 2 (239)  | WMD | 0.244 (-23.469,23.957) | 0.984 | 0.0  | -                | 0.000 | 0.9 (-24.53,26.33)   | 0/1.54 | -    | NS   |
|                             | Healthy<br>people                 | KD | LBM                        | 2 (33)   | WMD | -0.733 (-6.139,4.673)  | 0.790 | 0.0  | -                | 0.000 | -0.64 (-6.9,5.63)    | 0/0.2  | -    | NS   |
|                             |                                   | KD | VAT                        | 2 (33)   | WMD | -1.169 (-7.562,5.223)  | 0.720 | 0.0  | -                | 0.000 | -1.1 (-8.72,6.51)    | 0/0.42 | -    | NS   |
|                             | Cancer                            | KD | BMI                        | 4 (186)  | WMD | -1.401 (-12.053,9.251) | 0.797 | 0.0  | (-24.784,21.982) | 0.034 | -0.85 (-17.47,15.76) | 0/1.38 | -    | NS   |
|                             |                                   | KD | Body weight                | 7 (246)  | WMD | -0.215 (-4.529,4.100)  | 0.922 | 0.0  | (-5.873,5.444)   | 0.009 | 0.54 (-6.01,7.1)     | 0/0.97 | -    | NS   |
| Zhang et al.<br>2022 [15]   | CDKL5-<br>related<br>epilepsy     | KD | Clinical<br>responder rate | 11 (183) | OR  | 0.626 (0.342,1.147)    | 0.130 | 45.6 | (0.133,2.942)    | 0.011 | 1.42 (0.96,2.1)      | 2/0.92 | 0.23 | NS   |
|                             |                                   | KD | Definite<br>responder rate | 3 (24)   | OR  | 0.225 (0.070,0.721)    | 0.012 | 0.0  | (0,427.408)      | 0.639 | 0.2 (0.04,0.91)      | 1/1.04 | -    | Weak |

BMI, body mass index; DBP, diastolic blood pressure; FFM, fat-free mass; FM, fat mass; HDL, high density lipoprotein; HOMA-IR, homeostatic model assessment index of insulin resistance; HbA1c, glycated hemoglobin; HRmax, maximal heart rate during exercise; LBM, lean body mass; LDL, low density lipoprotein; RER, respiratory exchange rate; RPE, perceived exertion; SBP, systolic blood pressure; TTE, time to exhaustion; TC, total cholesterol; TG, triglycerides; VAT, visceral adipose tissue; VO<sub>2</sub>max, maximum oxygen uptake; WC, waist circumference; KD, ketogenic diet; VLCKD, very-low-carbohydrate ketogenic diets; K-LCHF, ketogenic low-carbohydrate, high-fat; MAD, modified Atkins diet; HP, high-protein; MP, moderate-protein; MD, mean difference; O, observed number of studies with positive finding; ref, reference; SMD, standardized mean difference; WMD, weighted mean difference; OR, odds ratio; RR, relative risk.

Supplemental Table S2 Quantitative synthesis and evidence grading for meta-analyses of combination of diet and physical activity interventions for clinical and non-clinical health problems

| Study, year<br>(ref )   | Study<br>disease or<br>population | Intervention | Outcomes                            | No. of<br>studies<br>(partici<br>pants,<br>n) | Origi<br>nal<br>effect<br>metri<br>cs | Random-effects<br>summary estimate<br>(95% CI) | Rand<br>om-<br>effects<br><i>P</i> | <i>I</i> <sup>2</sup> ,<br>% | 95% Prediction<br>interval | Egger<br>'s<br>test><br><i>P</i> | Largest study<br>estimate<br>(95% CI) | Significant<br>studies | O/E  | <i>P</i> | Gradi<br>ng |
|-------------------------|-----------------------------------|--------------|-------------------------------------|-----------------------------------------------|---------------------------------------|------------------------------------------------|------------------------------------|------------------------------|----------------------------|----------------------------------|---------------------------------------|------------------------|------|----------|-------------|
| Lee et al.<br>2021 [16] | Overweig<br>ht and<br>obese       | Exercise, KD | BMI                                 | 5 (136)                                       | SMD                                   | -0.122 (-0.532,0.287)                          | 0.557                              | 37.6                         | (-1.245,1.0)               | 0.257                            | -0.24 (-0.73,0.26)                    | 1/0.31                 | 0.28 | NS       |             |
|                         |                                   | Exercise, KD | Body fat mass                       | 2 (49)                                        | SMD                                   | -0.146 (-0.751,0.459)                          | 0.636                              | 0.0                          | -                          | 0.000                            | 0.07 (-0.7,0.82)                      | 0/0.10                 | -    | NS       |             |
|                         |                                   | Exercise, KD | Body weight                         | 5 (136)                                       | SMD                                   | -0.301(-0.545,-0.056)                          | 0.016                              | 3.64                         | (-0.745,0.143)             | 0.011                            | -0.47 (-0.35,0.22)                    | 71867                  | 766  | Weak     |             |
|                         |                                   |              | Cardiorespirator                    |                                               |                                       |                                                |                                    |                              |                            |                                  |                                       |                        |      |          |             |
|                         |                                   | Exercise, KD | y fitness<br>(VO <sup>2</sup> peak) | 3 (87)                                        | SMD                                   | 0.029 (-0.139,0.196)                           | 0.738                              | 10.3                         | (-1.544,1.602)             | 0.059                            | -0.01 (-0.5,-0.48)                    | 0/0.15                 | -    | NS       |             |
|                         |                                   | Exercise, KD | Fasting glucose                     | 4 (103)                                       | SMD                                   | -0.063 (-0.363,0.237)                          | 0.682                              | 0                            | (-0.721,0.596)             | 0.236                            | -0.01 (-0.4,0.39)                     | 0/0.2                  | -    | NS       |             |
|                         |                                   | Exercise, KD | HDL                                 | 3 (74)                                        | SMD                                   | 0.188 (-0.079,0.455)                           | 0.167                              | 0                            | (-1.543,1.92)              | 0.673                            | 0.25 (-0.5,0.1)                       | 0/0.19                 | -    | NS       |             |
|                         |                                   | Exercise, KD | LDL                                 | 3 (74)                                        | SMD                                   | 0.736 (0.262,1.210)                            | 0.002                              | 0                            | (-2.336,3.809)             | 0.682                            | 0.85 (0.1,1.6)                        | 1/0.60                 | 0.49 | Weak     |             |
|                         |                                   | Exercise, KD | Lean body mass                      | 2 (49)                                        | SMD                                   | -0.739 (-2.406,0.929)                          | 0.385                              | 87.0                         | -                          | 0.000                            | 0.03 (-0.73,0.08)                     | 1/0.1                  | 0.1  | NS       |             |
|                         |                                   | Exercise, KD | TC                                  | 3 (74)                                        | SMD                                   | 0.315 (-0.155,0.786)                           | 0.189                              | 3.0                          | (-2.875,3.506)             | 0.227                            | 0 (-0.72,0.72)                        | 0/0.15                 | -    | NS       |             |
|                         |                                   | Exercise, KD | TG                                  | 3 (74)                                        | SMD                                   | -0.443 (-0.912,0.026)                          | 0.064                              | 1.8                          | (-3.564,2.678)             | 0.081                            | -0.29 (-0.99,0.45)                    | 1/0.2                  | 0.19 | NS       |             |

|                              |                           |                                                   |                                 |        |     |                       |            |      |                |       |                   |        |      |      |
|------------------------------|---------------------------|---------------------------------------------------|---------------------------------|--------|-----|-----------------------|------------|------|----------------|-------|-------------------|--------|------|------|
| Lee et al.<br>2021 [17]      | -                         | Exercise, KD                                      | WC                              | 2 (58) | SMD | -0.781 (-1.760,0.198) | 0.118      | 69.2 | -              | 0.000 | -0.3 (-1.02,0.42) | 1/0.14 | 0.14 | NS   |
|                              |                           | Exercise, KD                                      | Body mass                       | 2 (39) | SMD | 0.053 (-0.542,0.647)  | 0.862      | 0.0  | -              | 0.000 | 0.28 (-0.51,1.07) | 0/0.12 | -    | NS   |
| Whittaker et<br>al. 2022 [9] | Healthy<br>adult<br>males | HP-KD                                             | Cortisol, 0 hr<br>post-exercise | 2 (14) | SMD | -0.052 (-1.461,1.357) | 0.942      | 69.1 | -              | 0.000 | 0.63 (-0.38,1.64) | 0/0.18 | -    | NS   |
|                              |                           | KD, long-<br>duration<br>exercise                 | Cortisol, 0 hr<br>post-exercise | 6 (64) | SMD | 0.705 (0.326,1.084)   | <<br>0.001 | 0.0  | (0.168,1.242)  | 0.532 | 0.52 (-0.23,1.28) | 1/0.53 | 0.43 | Weak |
|                              |                           | KD, long-<br>duration<br>exercise                 | Cortisol, 1 hr<br>post-exercise | 4 (42) | SMD | 0.650 (0.206,1.094)   | 0.004      | 0.0  | (-0.324,1.625) | 0.710 | 0.41 (-0.34,1.16) | 1/0.3  | 0.27 | Weak |
|                              |                           | KD, short-<br>duration<br>exercise                | Cortisol, 0 hr<br>post-exercise | 2 (17) | SMD | -0.671 (-1.370,0.028) | 0.060      | 0.0  | -              | 0.000 | -0.6 (-1.46,0.26) | 0/0.19 | -    | NS   |
|                              |                           | KD≥3weeks                                         | Cortisol, 0 hr<br>post-exercise | 2 (19) | SMD | 0.174 (-1.403,1.751)  | 0.829      | 81.3 | -              | 0.000 | -0.6 (-1.46,0.26) | 0/0.2  | -    | NS   |
|                              |                           | KD < 3weeks                                       | Cortisol, 0 hr<br>post-exercise | 6 (62) | SMD | 0.500 (0.084,0.916)   | 0.018      | 13.1 | (-0.288,1.288) | 0.277 | 0.52 (-0.23,1.28) | 1/0.52 | 0.42 | Weak |
|                              |                           | MP-KD                                             | Cortisol, 0 hr<br>post-exercise | 6 (67) | SMD | 0.488 (0.007,0.969)   | 0.047      | 39.5 | (-0.759,1.736) | 0.626 | 0.52 (-0.23,1.28) | 1/0.55 | 0.44 | Weak |
|                              |                           | MP-KD <<br>3weeks & long-<br>duration<br>exercise | Cortisol, 2 hr<br>post-exercise | 3 (36) | SMD | 0.818 (0.333,1.302)   | 0.001      | 0.0  | (-2.324,3.959) | 0.304 | 0.61 (-0.15,1.37) | 2/0.36 | 0.04 | Weak |

|                                      |                   |              |           |          |     |                       |       |     |                 |       |                     |        |   |    |
|--------------------------------------|-------------------|--------------|-----------|----------|-----|-----------------------|-------|-----|-----------------|-------|---------------------|--------|---|----|
| Ashtary-Larky<br>et al. 2022<br>[18] | Healthy<br>people | Exercise, KD | BFP       | 4 (84)   | WMD | -0.966 (-9.214,7.282) | 0.818 | 0.0 | (-19.073,17.14) | 0.180 | 0.75 (-9.06,10.56)  | 0/0.62 | - | NS |
|                                      |                   | Exercise, KD | BMI       | 3 (67)   | WMD | -1.136 (-8.504,6.231) | 0.762 | 0.0 | (-48.9,46.628)  | 0.103 | -0.73 (-10.49,9.03) | 0/0.45 | - | NS |
|                                      |                   | Exercise, KD | Body mass | 11 (212) | WMD | -0.820 (-3.705,2.065) | 0.577 | 0.0 | (-4.15,2.51)    | 0.000 | -0.69 (-6.71,5.33)  | 0/1.45 | - | NS |
|                                      |                   | Exercise, KD | FFM       | 11 (212) | WMD | -0.639 (-3.308,2.029) | 0.639 | 0.0 | (-3.719,2.441)  | 0.006 | -0.1 (-5.86,5.65)   | 0/0.57 | - | NS |
|                                      |                   | Exercise, KD | FM        | 10 (192) | WMD | -1.126 (-4.584,2.333) | 0.524 | 0.0 | (-5.195,2.944)  | 0.003 | -0.65 (-7.05,5.76)  | 0/1.22 | - | NS |

**Supplemental Table S3. Efficacy outcome of epilepsy (%) according to different dietary regimens/patterns.**

| Study, year (ref )         | Classification                     | Design        | Intervention        | Efficacy outcome                                                |      |                   |
|----------------------------|------------------------------------|---------------|---------------------|-----------------------------------------------------------------|------|-------------------|
|                            |                                    |               |                     | ≥50%                                                            | ≥90% | SF                |
| KD                         |                                    |               |                     |                                                                 |      |                   |
| Liu et al. 2019 [19]       | Dravet syndrome                    | Retrospective | KD ( <i>n</i> = 26) | 3mo: 38.5% (10/26)<br>6mo: 34.6% (9/26)<br>12mo: 84.6% (22/26)  | -    | -                 |
| Liu et al. 2019 [20]       | Dravet syndrome                    | Prospective   | KD ( <i>n</i> = 16) | 3mo: 62.5% (10/16)<br>6mo: 75.0% (12/16)<br>12mo: 68.8% (11/16) | -    | -                 |
| Ni et al. 2018 [21]        | Dravet syndrome                    | Prospective   | KD ( <i>n</i> = 20) | 3mo: 85.0% (17/20)<br>6mo: 85.0% (17/20)                        | -    | -                 |
| Tian et al. 2018 [22]      | Dravet syndrome                    | Retrospective | KD ( <i>n</i> = 60) | 3mo: 58.3% (35/60)<br>6mo: 41.7% (25/60)<br>12mo: 28.3% (17/60) | -    | -                 |
| Dressler et al. 2015 [23]  | Dravet syndrome                    | Retrospective | KD ( <i>n</i> = 10) | 3mo: 70.0% (7/10)<br>6mo: 60.0% (6/10)<br>12mo: 60.0% (6/10)    | -    | 3mo: 10.0% (1/10) |
| Caraballo et al. 2011 [24] | Dravet syndrome                    | Retrospective | KD ( <i>n</i> = 24) | -                                                               | -    | -                 |
| Nabbout et al. 2011 [25]   | Dravet syndrome                    | Prospective   | KD ( <i>n</i> = 15) | -                                                               | -    | -                 |
| Caraballo et al. 2005 [26] | Dravet syndrome                    | Retrospective | KD ( <i>n</i> = 20) | 6mo: 65.0% (13/20)<br>12mo: 65.0% (13/20)                       | -    | -                 |
| Nei et al. 2014 [27]       | Epilepsy in adults and adolescents | Prospective   | KD ( <i>n</i> = 29) | 9mo: 44.8% (13/29)                                              |      |                   |

|                               |                 |               |                 |                    |   |                    |
|-------------------------------|-----------------|---------------|-----------------|--------------------|---|--------------------|
| Dressler et al. 2019 [28]     | Infant epilepsy | Prospective   | KD ( $n = 16$ ) | 3mo: 62.5% (10/16) | - | 3mo: 62.5% (10/16) |
| Dressler et al. 2018 [29]     | Infant epilepsy | Prospective   | KD ( $n = 11$ ) | 3mo: 72.7% (8/11)  | - | 3mo: 27.3% (3/11)  |
| Ismayilova et al. 2018 [30]   | Infant epilepsy | Retrospective | KD ( $n = 29$ ) | 3mo: 24.1% (7/29)  | - | 3mo: 6.9% (2/29)   |
| Wirrell et al. 2018 [31]      | Infant epilepsy | Retrospective | KD ( $n = 26$ ) | 3mo: 61.5% (16/26) | - | 3mo: 34.6% (9/26)  |
| Yan et al. 2018 [21]          | Infant epilepsy | Prospective   | KD ( $n = 6$ )  | 3mo: 100.0% (6/6)  | - | -                  |
| Zhang et al. 2018 [32]        | Infant epilepsy | Prospective   | KD ( $n = 2$ )  | 3mo: 50.0% (1/2)   | - | 3mo: 0.0% (0/2)    |
| Sampaio et al. 2017 [33]      | Infant epilepsy | Prospective   | KD ( $n = 1$ )  | 3mo: 100.0% (1/1)  | - | -                  |
| Kim et al. 2016 [34]          | Infant epilepsy | Retrospective | KD ( $n = 37$ ) | 3mo: 48.6% (18/37) | - | 3mo: 35.1% (13/37) |
| Wu et al. 2016 [35]           | Infant epilepsy | Retrospective | KD ( $n = 6$ )  | 3mo: 33.3% (2/6)   | - | 3mo: 16.7% (1/6)   |
| Dressler et al. 2015 [36]     | Infant epilepsy | Retrospective | KD ( $n = 58$ ) | 3mo: 63.8% (37/58) | - | 3mo: 34.5% (20/58) |
| Hirano et al. 2015 [37]       | Infant epilepsy | Retrospective | KD ( $n = 5$ )  | 3mo: 100.0% (5/5)  | - | 3mo: 20.0% (1/5)   |
| van der Louw et al. 2015 [38] | Infant epilepsy | Retrospective | KD ( $n = 25$ ) | 3mo: 56.0% (14/25) | - | -                  |
| Vehmeijer et al. 2015 [39]    | Infant epilepsy | Retrospective | KD ( $n = 16$ ) | 3mo: 31.3% (5/16)  | - | -                  |
| Caraballo et al. 2014 [40]    | Infant epilepsy | Retrospective | KD ( $n = 1$ )  | 3mo: 100.0% (1/1)  | - | 3mo: 0.0% (0/1)    |
| Pires et al. 2013 [41]        | Infant epilepsy | Prospective   | KD ( $n = 17$ ) | 3mo: 88.2% (15/17) | - | 3mo: 64.7% (11/17) |
| Jung et al. 2012 [42]         | Infant epilepsy | Retrospective | KD ( $n = 2$ )  | 3mo: 100.0% (2/2)  | - | 3mo: 50.0% (1/2)   |
| Kumada et al. 2012 [43]       | Infant epilepsy | Prospective   | KD ( $n = 3$ )  | 3mo: 66.7% (2/3)   | - | 3mo: 66.7% (2/3)   |
| Larson et al. 2012 [44]       | Infant epilepsy | Retrospective | KD ( $n = 2$ )  | 3mo: 100.0% (2/2)  | - | 3mo: 50.0% (1/2)   |
| Sharma et al. 2012 [45]       | Infant epilepsy | Prospective   | KD ( $n = 6$ )  | 3mo: 50.0% (3/6)   | - | 3mo: 50.0% (3/6)   |
| Coppola et al. 2010 [46]      | Infant epilepsy | Prospective   | KD ( $n = 11$ ) | 3mo: 81.8% (9/11)  | - | -                  |
| Tonekaboni et al. 2010 [47]   | Infant epilepsy | Prospective   | KD ( $n = 3$ )  | 3mo: 66.7% (2/3)   | - | 3mo: 33.3% (1/3)   |
| Villeneuve et al. 2009 [48]   | Infant epilepsy | Retrospective | KD ( $n = 5$ )  | 3mo: 20.0% (1/5)   | - | -                  |



|                             |                         |               |                     |                     |                     |                    |
|-----------------------------|-------------------------|---------------|---------------------|---------------------|---------------------|--------------------|
| Dahlin et al. 2007 [49]     | Infant epilepsy         | Prospective   | KD ( <i>n</i> = 2)  | 3mo: 50.0% (1/2)    | -                   | -                  |
| Eun et al. 2006 [50]        | Infant epilepsy         | Retrospective | KD ( <i>n</i> = 10) | 3mo: 60.0% (6/10)   | -                   | 3mo: 60.0% (6/10)  |
| Dahlin et al. 2005 [51]     | Infant epilepsy         | Prospective   | KD ( <i>n</i> = 1)  | 3mo: 100.0% (1/1)   | -                   | -                  |
| Hosain et al. 2005 [52]     | Infant epilepsy         | Prospective   | KD ( <i>n</i> = 4)  | 3mo: 100.0% (4/4)   | -                   | -                  |
| Kang et al. 2005 [53]       | Infant epilepsy         | Retrospective | KD ( <i>n</i> = 49) | 3mo: 57.1% (28/49)  | -                   | 3mo: 32.7% (16/49) |
| Coppola et al. 2002 [54]    | Infant epilepsy         | Prospective   | KD ( <i>n</i> = 1)  | 3mo: 100.0% (1/1)   | -                   | 3mo: 100.0% (1/1)  |
| Takeoka et al. 2002 [55]    | Infant epilepsy         | Retrospective | KD ( <i>n</i> = 1)  | 3mo: 100.0% (1/1)   | -                   | 3mo: 100.0% (1/1)  |
| Maydell et al. 2001 [56]    | Infant epilepsy         | Retrospective | KD ( <i>n</i> = 15) | 3mo: 46.7% (7/15)   | -                   | -                  |
| Nordli et al. 2001 [57]     | Infant epilepsy         | Retrospective | KD ( <i>n</i> = 32) | 3mo: 53.1% (17/32)  | -                   | 3mo: 18.8% (6/32)  |
| Freeman et al. 1998 [58]    | Infant epilepsy         | Prospective   | KD ( <i>n</i> = 27) | 3mo: 63.0% (17/27)  | -                   | 3mo: 0.0% (0/27)   |
| Eun et al. 2006 [50]        | Infantile spasms        | Retrospective | KD ( <i>n</i> = 43) | 3mo: 69.8% (30/43)  | -                   | 3mo: 34.9% (15/43) |
|                             |                         |               |                     | 6mo: 53.5% (23/43)  |                     | 6mo: 39.5% (17/43) |
| Kossoff et al. 2002 [59]    | Infantile spasms        | Retrospective | KD ( <i>n</i> = 23) | 3mo: 60.9% (14/23)  | 3mo: 11.3% (8/71)   | 3mo: 4.2% (3/71)   |
|                             |                         |               |                     | 6mo: 56.5% (13/23)  | 6mo: 9.9% (7/71)    | 6mo: 4.2% (3/71)   |
|                             |                         |               |                     | 12mo: 56.5% (13/23) | 12mo: 8.5% (6/71)   | 12mo: 4.2% (3/71)  |
| Caraballo et al. 2020 [60]  | Lennox Gastaut syndrome | Retrospective | KD ( <i>n</i> = 18) | 18mo: 44.4% (8/18)  | -                   | 18mo: 16.7% (3/18) |
| Zhang et al. 2016 [61]      | Lennox-Gastaut syndrome | Retrospective | KD ( <i>n</i> = 47) | 3mo: 48.9% (23/47)  | 6mo: 19.1% (9/47)   | 6mo: 8.5% (4/47)   |
|                             |                         |               |                     | 6mo: 44.7% (21/47)  |                     |                    |
| Lemmon et al. 2012 [62]     | Lennox-Gastaut syndrome | Retrospective | KD ( <i>n</i> = 71) | 3mo: 74.6% (53/71)  | 3mo: 28.2% (20/71)  | 3mo: 4.2% (3/71)   |
|                             |                         |               |                     | 6mo: 50.7% (36/71)  | 6mo: 22.5% (16/71)  | 6mo: 1.4% (1/71)   |
|                             |                         |               |                     | 12mo: 43.7% (31/71) | 12mo: 19.7% (14/71) | 12mo: 1.4% (1/71)  |
| Caraballo et al. 2011 [63]  | Lennox Gastaut syndrome | Retrospective | KD ( <i>n</i> = 19) | 18mo: 63.2% (12/19) | -                   | 18mo: 36.8% (7/19) |
| Lambrechts et al. 2017 [64] | Pediatric epilepsy      | RCT           | KD ( <i>n</i> = 26) | 4mo: 50.0% (13/26)  | -                   | -                  |
| El-Rashidy et al. 2013 [65] | Pediatric epilepsy      | RCT           | KD ( <i>n</i> = 10) | 6mo: 100.0% (10/10) | -                   | -                  |
| Neal et al. 2008 [66]       | Pediatric epilepsy      | RCT           | KD ( <i>n</i> = 54) | 3mo: 38.9% (21/54)  | -                   | -                  |

|                           |                               |               |                      |                       |                    |                      |
|---------------------------|-------------------------------|---------------|----------------------|-----------------------|--------------------|----------------------|
|                           |                               |               | KD ( <i>n</i> = 9)   | 4mo: 11.1% (1/9)      |                    |                      |
| Lambrechts et al. 2012    |                               |               |                      | 6mo: 16.7% (1/6)      |                    |                      |
| [67]                      | Refractory adult epilepsy     | Prospective   |                      | 12mo: 40.0% (2/5)     |                    |                      |
| Sirven et al. 1999 [68]   | Refractory adult epilepsy     | Prospective   | KD ( <i>n</i> = 11)  | 8mo: 54.5% (6/11)     | 8mo: 27.3% (3/11)  | 8mo: 9.1% (1/11)     |
| Wu et al. 2016 [35]       | Refractory childhood epilepsy | Retrospective | KD ( <i>n</i> = 87)  | 3mo: 50.6% (44/87)    | 3mo: 35.6% (31/87) | 3mo: 29.9% (26/87)   |
|                           |                               |               |                      | 6mo: 51.7% (45/87)    | 6mo: 37.9% (33/87) | 6mo: 32.2% (28/87)   |
| Zamani et al. 2016 [69]   | Refractory childhood epilepsy | Prospective   | KD ( <i>n</i> = 33)  | 3mo: 63.6% (21/33)    | -                  | 3mo: 6.1% (2/33)     |
|                           |                               |               |                      | 6mo: 63.6% (21/33)    |                    |                      |
| Zhu et al. 2016 [70]      | Refractory childhood epilepsy | Prospective   | KD ( <i>n</i> = 42)  | 3mo: 69.0% (29/42)    | -                  | 3mo: 21.4% (9/42)    |
|                           |                               |               |                      | 6mo: 54.8% (23/42)    |                    | 6mo: 26.2% (11/42)   |
|                           |                               |               |                      | 12mo: 40.5% (17/42)   |                    | 12mo: 26.2% (11/42)  |
| Hallböök et al. 2015 [71] | Refractory childhood epilepsy | Retrospective | KD ( <i>n</i> = 315) | 3mo: 50.5% (159/315)  | -                  | 3mo: 12.1% (38/315)  |
|                           |                               |               |                      | 6mo: 46.0% (145/315)  |                    | 6mo: 14.9% (47/315)  |
|                           |                               |               |                      | 12mo: 41.9% (132/315) |                    | 12mo: 11.7% (37/315) |
| Kim et al. 2015 [34]      | Refractory childhood epilepsy | RCT           | KD ( <i>n</i> = 51)  | 3mo: 43.1% (22/51)    | 3mo: 37.3% (19/51) | 3mo: 33.3% (17/51)   |
|                           |                               |               |                      | 6mo: 39.2% (20/51)    | 6mo: 37.3% (19/51) | 6mo: 31.4% (16/51)   |
| Bansal et al. 2014 [72]   | Refractory childhood epilepsy | Prospective   | KD ( <i>n</i> = 60)  | 3mo: 50.0% (30/60)    | 3mo: 16.7% (10/60) | -                    |
| Kapetanakis et al. 2014   | Refractory childhood epilepsy | Retrospective | KD ( <i>n</i> = 43)  | 12mo: 27.9% (12/43)   | -                  | 12mo: 9.3% (4/43)    |
| [73]                      |                               |               |                      |                       |                    |                      |
| Kayyali et al. 2014 [74]  | Refractory childhood epilepsy | Prospective   | KD ( <i>n</i> = 20)  | 3mo: 70.0% (14/20)    | 3mo: 20.0% (4/20)  | -                    |
|                           |                               |               |                      | 6mo: 65.0% (13/20)    | 6mo: 20.0% (4/20)  |                      |
|                           |                               |               |                      | 12mo: 65.0% (13/20)   | 12mo: 30.0% (6/20) |                      |
| Shull et al. 2014 [75]    | Refractory childhood epilepsy | Retrospective | KD ( <i>n</i> = 48)  | -                     | -                  | -                    |
| Li et al. 2013 [76]       | Refractory childhood epilepsy | Prospective   | KD ( <i>n</i> = 31)  | 3mo: 71.0% (22/31)    | -                  | 3mo: 45.2% (14/31)   |
| Pires et al. 2013 [41]    | Refractory childhood epilepsy | Prospective   | KD ( <i>n</i> = 17)  | 3mo: 88.2% (15/17)    | -                  | 3mo: 64.7% (11/17)   |
|                           |                               |               |                      | 6mo: 82.4% (14/17)    |                    | 6mo: 52.9% (9/17)    |

|                            |                               |               |                      |                                                                     |                                                                    |                                                                    |
|----------------------------|-------------------------------|---------------|----------------------|---------------------------------------------------------------------|--------------------------------------------------------------------|--------------------------------------------------------------------|
| Suo et al. 2013 [77]       | Refractory childhood epilepsy | Prospective   | KD ( <i>n</i> = 317) | 3mo: 35.0% (111/317)<br>6mo: 26.2% (83/317)<br>12mo: 18.6% (59/317) | 3mo: 23.7% (75/317)<br>6mo: 17.0% (54/317)<br>12mo: 13.9% (44/317) | 3mo: 20.8% (66/317)<br>6mo: 13.6% (43/317)<br>12mo: 10.7% (34/317) |
| Dahlin et al. 2012 [78]    | Refractory childhood epilepsy | Retrospective | KD ( <i>n</i> = 26)  | 3mo: 65.4% (17/26)                                                  | 3mo: 26.9% (7/26)                                                  | 3mo: 19.2% (5/26)                                                  |
| Martins et al. 2012 [79]   | Refractory childhood epilepsy | Retrospective | KD ( <i>n</i> = 29)  | 6mo: 48.3% (14/29)<br>12mo: 27.6% (8/29)                            | -                                                                  | 6mo: 24.1% (7/29)<br>12mo: 13.8% (4/29)                            |
| Miranda et al. 2011 [80]   | Refractory childhood epilepsy | Retrospective | KD ( <i>n</i> = 50)  | 6mo: 60.0% (30/50)                                                  | 6mo: 34.0% (17/50)                                                 | -                                                                  |
| Raju et al. 2011 [81]      | Refractory childhood epilepsy | RCT           | KD ( <i>n</i> = 19)  | 3mo: 57.9% (11/19)                                                  | -                                                                  | 3mo: 26.3% (5/19)                                                  |
| Beniczky et al. 2010 [82]  | Refractory childhood epilepsy | Retrospective | KD ( <i>n</i> = 50)  | 3mo: 66.0% (33/50)                                                  | 3mo: 36.0% (18/50)                                                 | 3mo: 18.0% (9/50)                                                  |
| Coppola et al. 2010 [46]   | Refractory childhood epilepsy | Prospective   | KD ( <i>n</i> = 38)  | 3mo: 71.1% (27/38)<br>6mo: 73.7% (28/38)<br>12mo: 52.6% (20/38)     | -                                                                  | 3mo: 28.9% (11/38)<br>6mo: 31.6% (12/38)<br>12mo: 23.7% (9/38)     |
| Hong et al. 2010 [83]      | Refractory childhood epilepsy | Prospective   | KD ( <i>n</i> = 104) | 3mo: 63.5% (66/104)<br>6mo: 64.4% (67/104)<br>12mo: 76.9% (80/104)  | 3mo: 31.7% (33/104)<br>6mo: 39.4% (41/104)<br>12mo: 43.3% (45/104) | 3mo: 18.3% (19/104)<br>6mo: 27.9% (29/104)<br>12mo: 29.8% (31/104) |
| Lee et al. 2010 [84]       | Refractory childhood epilepsy | Prospective   | KD ( <i>n</i> = 28)  | -                                                                   | 3mo: 57.1% (16/28)                                                 | 3mo: 32.1% (9/28)                                                  |
| Mirjavadi et al. 2010 [85] | Refractory childhood epilepsy | Retrospective | KD ( <i>n</i> = 66)  | 3mo: 59.1% (39/66)                                                  | -                                                                  | 3mo: 18.2% (12/66)                                                 |
| Neal et al. 2009 [86]      | Refractory childhood epilepsy | RCT           | KD ( <i>n</i> = 73)  | 3mo: 24.7% (18/73)<br>6mo: 24.7% (18/73)<br>12mo: 17.8% (13/73)     | 3mo: 6.8% (5/73)<br>6mo: 8.2% (6/73)<br>12mo: 9.6% (7/73)          | 3mo: 1.4% (1/73)<br>6mo: 1.4% (1/73)<br>12mo: 5.5% (4/73)          |
| Porta et al. 2009 [87]     | Refractory childhood epilepsy | Retrospective | KD ( <i>n</i> = 17)  | 3mo: 64.7% (11/17)<br>6mo: 41.2% (7/17)<br>12mo: 23.5% (4/17)       | 3mo: 41.2% (7/17)<br>6mo: 23.5% (4/17)<br>12mo: 11.8% (2/17)       | -                                                                  |
| Sharma et al. 2009 [88]    | Refractory childhood epilepsy | Prospective   | KD ( <i>n</i> = 27)  | 3mo: 59.3% (16/27)<br>6mo: 48.1% (13/27)<br>12mo: 37.0% (10/27)     | 3mo: 25.9% (7/27)<br>6mo: 22.2% (6/27)<br>12mo: 25.9% (7/27)       | 3mo: 11.1% (3/27)<br>6mo: 14.8% (4/27)<br>12mo: 18.5% (5/27)       |

|                            |                               |               |                      |                                                                      |                                                              |                                                                    |
|----------------------------|-------------------------------|---------------|----------------------|----------------------------------------------------------------------|--------------------------------------------------------------|--------------------------------------------------------------------|
| Spulber et al. 2009 [89]   | Refractory childhood epilepsy | Prospective   | KD ( <i>n</i> = 22)  | 12mo: 63.6% (14/22)                                                  | 12mo: 31.8% (7/22)                                           | 12mo: 27.3% (6/22)                                                 |
| Villeneuve et al 2009 [48] | Refractory childhood epilepsy | Retrospective | KD ( <i>n</i> = 22)  | -                                                                    | -                                                            | -                                                                  |
| Jung et al. 2008 [90]      | Refractory childhood epilepsy | Retrospective | KD ( <i>n</i> = 47)  | 3mo: 61.7% (29/47)                                                   | -                                                            | 3mo: 44.7% (21/47)                                                 |
| Kossoff et al. 2008 [91]   | Refractory childhood epilepsy | Retrospective | KD ( <i>n</i> = 118) | 3mo: 75.4% (89/118)<br>6mo: 71.2% (84/118)                           | 3mo: 48.3% (57/118)<br>6mo: 43.2% (51/118)                   | -                                                                  |
| Remahl et al. 2008 [92]    | Refractory childhood epilepsy | Prospective   | KD ( <i>n</i> = 23)  | 3mo: 69.6% (16/23)                                                   | 3mo: 17.4% (4/23)                                            | 3mo: 13.0% (3/23)                                                  |
| Stainman et al. 2007 [93]  | Refractory childhood epilepsy | Retrospective | KD ( <i>n</i> = 45)  | 6mo: 75.6% (34/45)                                                   | 6mo: 60.0% (27/45)                                           | 6mo: 28.9% (13/45)                                                 |
| Freitas et al. 2007 [94]   | Refractory childhood epilepsy | Retrospective | KD ( <i>n</i> = 70)  | 6mo: 62.9% (44/70)<br>12mo: 54.3% (38/70)                            | -                                                            | -                                                                  |
| Dahlin et al. 2007 [49]    | Refractory childhood epilepsy | Prospective   | KD ( <i>n</i> = 25)  | 3mo: 64.0% (16/25)<br>6mo: 60.0% (15/25)<br>12mo: 48.0% (12/25)      | 3mo: 16.0% (4/25)<br>6mo: 32.0% (8/25)<br>12mo: 24.0% (6/25) | 3mo: 8.0% (2/25)<br>6mo: 12.0% (3/25)<br>12mo: 8.0% (2/25)         |
| Hallböök et al. 2007 [95]  | Refractory childhood epilepsy | Prospective   | KD ( <i>n</i> = 18)  | 3mo: 66.7% (12/18)<br>12mo: 44.4% (8/18)                             | 3mo: 44.4% (8/18)<br>12mo: 22.2% (4/18)                      | 3mo: 22.2% (4/18)<br>12mo: 11.1% (2/18)                            |
| Seo et al. 2007 [96]       | Refractory childhood epilepsy | RCT           | KD ( <i>n</i> = 36)  | 3mo: 72.2% (26/36)                                                   | 3mo: 36.1% (13/36)                                           | 3mo: 30.6% (11/36)                                                 |
| Seo et al. 2007 [96]       | Refractory childhood epilepsy | RCT           | KD ( <i>n</i> = 40)  | 3mo: 85.0% (34/40)                                                   | 3mo: 60.0% (24/40)                                           | 3mo: 55.0% (22/40)                                                 |
| Rizzutti et al. 2007 [97]  | Refractory childhood epilepsy | Prospective   | KD ( <i>n</i> = 46)  | 12mo: 67.4% (31/46)                                                  | 12mo: 32.6% (15/46)                                          | 12mo: 17.4% (8/46)                                                 |
| Kang et al. 2005 [53]      | Refractory childhood epilepsy | Retrospective | KD ( <i>n</i> = 199) | 3mo: 61.8% (123/199)<br>6mo: 57.8% (115/199)<br>12mo: 41.2% (82/199) | -                                                            | 3mo: 35.2% (70/199)<br>6mo: 33.2% (66/199)<br>12mo: 25.1% (50/199) |
| Kossoff et al. 2005 [98]   | Refractory childhood epilepsy | Retrospective | KD ( <i>n</i> = 12)  | 6mo: 91.7% (11/12)                                                   | 6mo: 66.7% (8/12)                                            | 6mo: 25.0% (3/12)                                                  |
| Mackay et al. 2005 [99]    | Refractory childhood epilepsy | Retrospective | KD ( <i>n</i> = 26)  | 3mo: 26.9% (7/26)<br>6mo: 19.2% (5/26)<br>12mo: 30.8% (8/26)         | -                                                            | -                                                                  |

|                              |                                    |               |                      |                                                                    |                                                                    |                                                                    |
|------------------------------|------------------------------------|---------------|----------------------|--------------------------------------------------------------------|--------------------------------------------------------------------|--------------------------------------------------------------------|
| Lyczkowski et al. 2005 [100] | Refractory childhood epilepsy      | Retrospective | KD ( <i>n</i> = 71)  | 3mo: 62.0% (44/71)<br>6mo: 46.5% (33/71)<br>12mo: 32.4% (23/71)    | 3mo: 32.4% (23/71)<br>6mo: 28.2% (20/71)<br>12mo: 21.1% (15/71)    | -                                                                  |
| Peterson et al. 2005 [101]   | Refractory childhood epilepsy      | Retrospective | KD ( <i>n</i> = 57)  | 12mo: 54.4% (31/57)                                                | 12mo: 33.3% (19/57)                                                | -                                                                  |
| Hosain et al. 2004 [52]      | Refractory childhood epilepsy      | Prospective   | KD ( <i>n</i> = 12)  | 12mo: 83.3% (10/12)                                                | 12mo: 50.0% (6/12)                                                 | 12mo: 0.0% (0/12)                                                  |
| Kim et al. 2004 [102]        | Refractory childhood epilepsy      | Retrospective | KD ( <i>n</i> = 83)  | 3mo: 75.9% (63/83)                                                 | 3mo: 53.0% (44/83)                                                 | 3mo: 34.9% (29/83)                                                 |
| Kim et al. 2004 [102]        | Refractory childhood epilepsy      | Prospective   | KD ( <i>n</i> = 41)  | 3mo: 75.6% (31/41)                                                 | 3mo: 53.7% (22/41)                                                 | 3mo: 34.1% (14/41)                                                 |
| DiMario et al. 2002 [103]    | Refractory childhood epilepsy      | Retrospective | KD ( <i>n</i> = 48)  | 6mo: 35.4% (17/48)<br>12mo: 22.9% (11/48)                          | -                                                                  | 6mo: 8.3% (4/48)<br>12mo: 8.3% (4/48)                              |
| Coppola et al. 2001 [54]     | Refractory childhood epilepsy      | Prospective   | KD ( <i>n</i> = 56)  | 3mo: 37.5% (21/56)<br>6mo: 26.8% (15/56)<br>12mo: 8.9% (5/56)      | -                                                                  | 3mo: 10.7% (6/56)<br>6mo: 7.1% (4/56)<br>12mo: 0.0% (0/56)         |
| Kankirawatana 2001 [104]     | Refractory childhood epilepsy      | Prospective   | KD ( <i>n</i> = 35)  | 3mo: 48.6% (17/35)<br>6mo: 42.9% (15/35)<br>12mo: 28.6% (10/35)    | 3mo: 42.9% (15/35)<br>6mo: 34.3% (12/35)<br>12mo: 22.9% (8/35)     | 3mo: 14.3% (5/35)<br>6mo: 11.4% (4/35)<br>12mo: 8.6% (3/35)        |
| Vining 1998 [105]            | Refractory childhood epilepsy      | Prospective   | KD ( <i>n</i> = 51)  | 3mo: 54.9% (28/51)<br>6mo: 52.9% (27/51)<br>12mo: 39.2% (20/51)    | 3mo: 25.5% (13/51)<br>6mo: 29.4% (15/51)<br>12mo: 21.6% (11/51)    | 3mo: 11.8% (6/51)<br>12mo: 9.8% (5/51)                             |
| Freeman 1998 [58]            | Refractory childhood epilepsy      | Prospective   | KD ( <i>n</i> = 150) | 3mo: 59.3% (89/150)<br>6mo: 51.3% (77/150)<br>12mo: 50.0% (75/150) | 3mo: 33.3% (50/150)<br>6mo: 32.0% (48/150)<br>12mo: 27.3% (41/150) | 3mo: 2.7% (4/150)<br>6mo: 3.3% (5/150)<br>12mo: 7.3% (11/150)      |
| Maydell et al. 2001 [56]     | Refractory epilepsy                | Prospective   | KD ( <i>n</i> = 143) | 3mo: 41.3% (59/143)<br>6mo: 42.0% (60/143)<br>12mo: 37.8% (54/143) | 3mo: 30.1% (43/143)<br>6mo: 28.7% (41/143)<br>12mo: 26.6% (38/143) | 3mo: 14.7% (21/143)<br>6mo: 16.8% (24/143)<br>12mo: 16.1% (23/143) |
| Mady et al. 2003 [106]       | Refractory epilepsy in adolescents | Retrospective | KD ( <i>n</i> = 45)  | 6mo: 31.1% (14/45)<br>12mo: 28.9% (13/45)                          | 6mo: 17.8% (8/45)<br>12mo: 13.3% (6/45)                            | -                                                                  |

|                              |                               |               |                       |                                                                   |                                                              |                                                                   |
|------------------------------|-------------------------------|---------------|-----------------------|-------------------------------------------------------------------|--------------------------------------------------------------|-------------------------------------------------------------------|
| MAD                          |                               |               |                       |                                                                   |                                                              |                                                                   |
| Sharma et al. 2014 [107]     | Lennox Gastaut syndrome       | Retrospective | MAD ( <i>n</i> = 25)  | 3mo: 48.0% (12/25)<br>6mo: 44.0% (11/25)<br>12mo: 36.0% (9/25)    | 3mo: 24.0% (6/25)<br>6mo: 28.0% (7/25)<br>12mo: 32.0% (8/25) | 3mo: 8.0% (2/25)<br>6mo: 12.0% (3/25)<br>12mo: 12.0% (3/25)       |
| El-Rashidy et al.2013 [65]   | Pediatric epilepsy            | RCT           | MAD ( <i>n</i> = 15)  | 6mo: 40.0% (6/15)                                                 | -                                                            | -                                                                 |
| Cervenka et al. 2016 [108]   | Refractory adult epilepsy     | Prospective   | MAD ( <i>n</i> = 106) | 3mo: 35.8% (38/106)<br>6mo: 30.5% (32/105)<br>12mo: 29.6% (29/98) | -                                                            | 3mo: 16.0% (17/106)<br>6mo: 14.3% (15/105)<br>12mo: 13.3% (13/98) |
| Vaccarezza et al. 2014 [109] | Refractory adult epilepsy     | Prospective   | MAD ( <i>n</i> = 3)   | 3mo: 33.3% (1/3)                                                  | -                                                            | -                                                                 |
| Kossoff et al. 2013 [110]    | Refractory adult epilepsy     | Prospective   | MAD ( <i>n</i> = 8)   | 3mo: 62.5% (5/8)                                                  | -                                                            | 3mo: 25.0% (2/8)                                                  |
| Cervenka et al. 2012 [111]   | Refractory adult epilepsy     | Prospective   | MAD ( <i>n</i> = 22)  | 3mo: 27.3% (6/22)                                                 | 3mo: 13.6% (3/22)                                            | 3mo: 4.5% (1/22)                                                  |
| Smith et al. 2011 [112]      | Refractory adult epilepsy     | Prospective   | MAD ( <i>n</i> = 17)  | 3mo: 11.8% (2/17)<br>6mo: 28.6% (4/14)<br>12mo: 21.4% (3/14)      | -                                                            | -                                                                 |
| Kossoff et al. 2008 [113]    | Refractory adult epilepsy     | Prospective   | MAD ( <i>n</i> = 18)  | 3mo: 72.2% (13/18)<br>6mo: 50.0% (9/18)                           | -                                                            | 3mo: 5.6% (1/18)<br>6mo: 5.6% (1/18)                              |
| Sharma et al. 2016 [114]     | Refractory childhood epilepsy | RCT           | MAD ( <i>n</i> = 41)  | 3mo: 56.1% (23/41)                                                | 3mo: 19.5% (8/41)                                            | 3mo: 14.6% (6/41)                                                 |
| Kim et al. 2015 [34]         | Refractory childhood epilepsy | RCT           | MAD ( <i>n</i> = 53)  | 3mo: 41.5% (22/53)<br>6mo: 35.8% (19/53)                          | 3mo: 32.1% (17/53)<br>6mo: 30.2% (16/53)                     | 3mo: 24.5% (13/53)<br>6mo: 22.6% (12/53)                          |
| Vaccarezzaa 2014 [115]       | Refractory childhood epilepsy | Retrospective | MAD ( <i>n</i> = 9)   | 6mo: 66.7% (6/9)                                                  | 6mo: 22.2% (2/9)                                             | -                                                                 |
| Sharma et al. 2013 [116]     | Refractory childhood epilepsy | RCT           | MAD ( <i>n</i> = 50)  | 3mo: 52.0% (26/50)                                                | 3mo: 30.0% (15/50)                                           | 3mo: 10.0% (5/50)                                                 |
| Chen et al. 2012 [117]       | Refractory childhood epilepsy | Retrospective | MAD ( <i>n</i> = 87)  | 6mo: 41.4% (36/87)<br>12mo: 37.9% (33/87)                         | 6mo: 27.6% (24/87)<br>12mo: 28.7% (25/87)                    | 12mo: 18.4% (16/87)                                               |
| Sharma et al. 2012 [45]      | Refractory childhood epilepsy | Prospective   | MAD ( <i>n</i> = 15)  | -                                                                 | 6mo: 60.0% (9/15)                                            | 3mo: 40.0% (6/15)                                                 |

|                             |                                                 |               |                                          |                                                                |                                                               |                                                            |
|-----------------------------|-------------------------------------------------|---------------|------------------------------------------|----------------------------------------------------------------|---------------------------------------------------------------|------------------------------------------------------------|
|                             |                                                 |               |                                          |                                                                |                                                               | 6mo: 40.0% (6/15)                                          |
| Miranda et al. 2011 [80]    | Refractory childhood epilepsy                   | Prospective   | MAD ( $n = 33$ )                         | 3mo: 51.5% (17/33)<br>6mo: 39.4% (13/33)<br>12mo: 27.3% (9/33) | 3mo: 42.4% (14/33)<br>6mo: 18.2% (6/33)<br>12mo: 12.1% (4/33) | 3mo: 15.2% (5/33)<br>6mo: 0.0% (0/33)<br>12mo: 0.0% (0/33) |
| Tonekaboni et al. 2010 [47] | Refractory childhood epilepsy                   | Prospective   | MAD ( $n = 51$ )                         | 3mo: 31.4% (16/51)                                             | 3mo: 11.8% (6/51)                                             | 3mo: 9.8% (5/51)                                           |
| Barzegar et al. 2010 [118]  | Refractory childhood epilepsy                   | Prospective   | MAD ( $n = 21$ )                         | 3mo: 57.1% (12/21)<br>6mo: 42.9% (9/21)                        | 3mo: 33.3% (7/21)<br>6mo: 33.3% (7/21)                        | -                                                          |
| Porta et al. 2009 [87]      | Refractory childhood epilepsy                   | Retrospective | MAD ( $n = 10$ )                         | 3mo: 20.0% (2/10)<br>6mo: 20.0% (2/10)<br>12mo: 10.0% (1/10)   | 3mo: 10.0% (1/10)<br>6mo: 20.0% (2/10)<br>12mo: 10.0% (1/10)  | -                                                          |
| Kang et al. 2007 [119]      | Refractory childhood epilepsy                   | Prospective   | MAD ( $n = 14$ )                         | 3mo: 50.0% (7/14)<br>6mo: 35.7% (5/14)                         | -                                                             | 3mo: 28.6% (4/14)<br>6mo: 21.4% (3/14)                     |
| Kossoff et al. 2006 [120]   | Refractory childhood epilepsy                   | Prospective   | MAD ( $n = 20$ )                         | 3mo: 70.0% (14/20)<br>6mo: 65.0% (13/20)                       | 3mo: 25.0% (5/20)<br>6mo: 35.0% (7/20)                        | 3mo: 15.0% (3/20)<br>6mo: 20.0% (4/20)                     |
| Weber et al. 2009 [121]     | Refractory epilepsy in children and adolescents | Prospective   | MAD ( $n = 15$ )                         | 3mo: 40.0% (6/15)                                              | 3mo: 13.3% (2/15)                                             | -                                                          |
| Kossoff et al. 2010 [122]   | Sturge-Weber syndrome                           | Prospective   | MAD ( $n = 5$ )                          | 3mo: 60.0% (3/5)<br>6mo: 60.0% (3/5)                           | 3mo: 40.0% (2/5)<br>6mo: 40.0% (2/5)                          | 3mo: 20.0% (1/5)<br>6mo: 20.0% (1/5)                       |
| Control group               |                                                 |               |                                          |                                                                |                                                               |                                                            |
| Stainman et al. 2007 [93]   | Childhood epilepsy                              | Retrospective | Surgically approachable( $n = 45$ )      | 6mo: 62.2% (28/45)                                             | 6mo: 26.7% (12/45)                                            | 6mo: 13.3% (6/45)                                          |
| Dressler et al. 2019 [28]   | Infant epilepsy                                 | Prospective   | Adrenocorticotrophic hormone( $n = 16$ ) | 3mo: 68.8% (11/16)                                             | -                                                             | 3mo: 43.8% (7/16)                                          |
| El-Rashidy et al.2013 [65]  | Pediatric epilepsy                              | RCT           | Usual care( $n = 15$ )                   | 6mo: 6.6% (1/15)                                               | -                                                             | -                                                          |
| Neal et al. 2008 [66]       | Pediatric epilepsy                              | RCT           | Usual care( $n = 49$ )                   | 3mo: 6.1% (3/49)                                               | -                                                             | -                                                          |

|                             |                               |     |                               |                   |                   |                  |
|-----------------------------|-------------------------------|-----|-------------------------------|-------------------|-------------------|------------------|
| Lambrechts et al. 2017 [64] | Pediatric epilepsy            | RCT | Usual care( <i>n</i> = 22)    | 4mo: 15.4% (4/26) | -                 | -                |
| Sharma et al. 2016 [114]    | Refractory childhood epilepsy | RCT | Routine diet( <i>n</i> = 40)  | 3mo: 7.5% (3/40)  | 3mo: 5.0% (2/40)  | 3mo: 5.0% (2/40) |
| Sharma et al. 2013 [116]    | Refractory childhood epilepsy | RCT | Control group( <i>n</i> = 52) | 3mo: 11.5% (6/52) | 3mo: 13.5% (7/52) | 3mo: 0.0% (0/52) |

**Abbreviation.** CON, control; KD, Ketogenic Diet; MAD, Modified Atkins diet; RCT, randomized controlled trial;  $\geq 50\%$ , proportion  $\geq 50\%$  seizure reduction;  $\geq 90\%$ , proportion  $\geq 90\%$  seizure reduction; SF, seizure freedom; N/A, not available; SF, seizure free; RCT, randomized controlled trial; mo, month.



## Reference:

1. Castellana, M., et al., *Efficacy and safety of very low calorie ketogenic diet (VLCKD) in patients with overweight and obesity: A systematic review and meta-analysis*. Rev Endocr Metab Disord, 2020. **21**(1): p. 5-16.
2. Choi, Y.J., S.M. Jeon, and S. Shin, *Impact of a Ketogenic Diet on Metabolic Parameters in Patients with Obesity or Overweight and with or without Type 2 Diabetes: A Meta-Analysis of Randomized Controlled Trials*. Nutrients, 2020. **12**(7).
3. Muscogiuri, G., et al., *European Guidelines for Obesity Management in Adults with a Very Low-Calorie Ketogenic Diet: A Systematic Review and Meta-Analysis*. Obes Facts, 2021. **14**(2): p. 222-245.
4. Cao, J., et al., *The Effect of a Ketogenic Low-Carbohydrate, High-Fat Diet on Aerobic Capacity and Exercise Performance in Endurance Athletes: A Systematic Review and Meta-Analysis*. Nutrients, 2021. **13**(8).
5. Bueno, N.B., et al., *Very-low-carbohydrate ketogenic diet v. low-fat diet for long-term weight loss: a meta-analysis of randomised controlled trials*. Br J Nutr, 2013. **110**(7): p. 1178-87.
6. Gibson, A.A., et al., *Do ketogenic diets really suppress appetite? A systematic review and meta-analysis*. Obes Rev, 2015. **16**(1): p. 64-76.
7. Sourbron, J., et al., *Ketogenic diet for the treatment of pediatric epilepsy: review and meta-analysis*. Childs Nerv Syst, 2020. **36**(6): p. 1099-1109.
8. Yang, Y.F., et al., *Efficacy of Low-Carbohydrate Ketogenic Diet as an Adjuvant Cancer Therapy: A Systematic Review and Meta-Analysis of Randomized Controlled Trials*. Nutrients, 2021. **13**(5).
9. Whittaker, J. and M. Harris, *Low-carbohydrate diets and men's cortisol and testosterone: Systematic review and meta-analysis*. Nutr Health, 2022. **28**(4): p. 543-554.
10. Martin-McGill, K.J., et al., *Ketogenic diets for drug-resistant epilepsy*. Cochrane Database Syst Rev, 2020. **6**(6): p. Cd001903.
11. Zhou, C., et al., *Ketogenic Diet Benefits to Weight Loss, Glycemic Control, and Lipid Profiles in Overweight Patients with Type 2 Diabetes Mellitus: A Meta-Analysis of Randomized Controlled Trails*. Int J Environ Res Public Health, 2022. **19**(16).
12. Pizzo, F., et al., *Ketogenic diet in pediatric seizures: a randomized controlled trial review and meta-analysis*. Expert Rev Neurother, 2022. **22**(2): p. 169-177.
13. Amini, M.R., et al., *The effect of ketogenic diet on body composition and anthropometric measures: A systematic review and meta-analysis of randomized controlled trials*. Crit Rev Food Sci Nutr, 2022. **62**(13): p. 3644-3657.
14. Taftian, M., et al., *The Effect of Ketogenic Diet on Weight Loss in Adult Patients with Cancer: A Systematic Review and Meta-Analysis of Controlled Clinical Trials*. Nutr Cancer, 2022. **74**(4): p. 1222-1234.

15. Zhang, J., et al., *Efficacy of ketogenic diet in CDKL5-related epilepsy: a single arm meta-analysis*. Orphanet J Rare Dis, 2022. **17**(1): p. 385.
16. Lee, H.S. and J. Lee, *Effects of Combined Exercise and Low Carbohydrate Ketogenic Diet Interventions on Waist Circumference and Triglycerides in Overweight and Obese Individuals: A Systematic Review and Meta-Analysis*. Int J Environ Res Public Health, 2021. **18**(2).
17. Lee, H.S. and J. Lee, *Influences of Ketogenic Diet on Body Fat Percentage, Respiratory Exchange Rate, and Total Cholesterol in Athletes: A Systematic Review and Meta-Analysis*. Int J Environ Res Public Health, 2021. **18**(6).
18. Ashtary-Larky, D., et al., *Effects of resistance training combined with a ketogenic diet on body composition: a systematic review and meta-analysis*. Crit Rev Food Sci Nutr, 2022. **62**(21): p. 5717-5732.
19. Liu, F.Y., et al., *Efficacy of the ketogenic diet in Chinese children with Dravet syndrome: A focus on neuropsychological development*. Epilepsy & Behavior, 2019. **92**: p. 98-102.
20. Liu, J., et al., *Prospective control study of efficacy and safety of ketogenic diet on drug refractory Dravet syndrome*. Chinese Journal of Applied Clinical Pediatrics, 2019. **34**(15): p. 1160-1165.
21. Ni, Y., et al., *Prospective study of the efficacy of a ketogenic diet in 20 patients with Dravet syndrome*. Seizure-European Journal of Epilepsy, 2018. **60**: p. 144-148.
22. Tian, X.J., et al., *The Efficacy of Ketogenic Diet in 60 Chinese Patients With Dravet Syndrome*. Frontiers in Neurology, 2019. **10**.
23. Dressler, A., et al., *Efficacy and tolerability of the ketogenic diet in Dravet syndrome - Comparison with various standard antiepileptic drug regimen*. Epilepsy Research, 2015. **109**: p. 81-89.
24. Caraballo, R.H., *Nonpharmacologic treatments of Dravet syndrome: Focus on the ketogenic diet*. Epilepsia, 2011. **52**: p. 79-82.
25. Nabbout, R., et al., *Ketogenic diet also benefits Dravet syndrome patients receiving stiripentol: A prospective pilot study*. Epilepsia, 2011. **52**(7): p. E54-E57.
26. Caraballo, R.H., et al., *Ketogenic diet in patients with Dravet syndrome*. Epilepsia, 2005. **46**(9): p. 1539-1544.
27. Nei, M., et al., *Ketogenic diet in adolescents and adults with epilepsy*. Seizure, 2014. **23**(6): p. 439-42.
28. Dressler, A., et al., *Efficacy and tolerability of the ketogenic diet versus high-dose adrenocorticotrophic hormone for infantile spasms: A single-center parallel-cohort randomized controlled trial*. Epilepsia, 2019. **60**(3): p. 441-451.
29. Dressler, A., et al., *Ketogenic parenteral nutrition in 17 pediatric patients with epilepsy*. Epilepsia open, 2018. **3**(1): p. 30-39.
30. Ismayilova, N., et al., *Ketogenic diet therapy in infants less than two years of age for medically refractory epilepsy*. Seizure-European Journal of Epilepsy, 2018. **57**: p. 5-7.

31. Wirrell, E., et al., *Ketogenic Diet Therapy in Infants: Efficacy and Tolerability*. Pediatric Neurology, 2018. **82**: p. 13-18.
32. Zhang, Y.J., et al., *Altered gut microbiome composition in children with refractory epilepsy after ketogenic diet*. Epilepsy Research, 2018. **145**: p. 163-168.
33. Sampaio, L.P.D., C. Takakura, and M.L.G. de Manreza, *The use of a formula-based ketogenic diet in children with refractory epilepsy*. Arquivos De Neuro-Psiquiatria, 2017. **75**(4): p. 234-237.
34. Kim, J.A., et al., *Efficacy of the classic ketogenic and the modified Atkins diets in refractory childhood epilepsy*. Epilepsia, 2016. **57**(1): p. 51-58.
35. Wu, Y.J., et al., *Six-month efficacy of the Ketogenic diet is predicted after 3 months and is unrelated to clinical variables*. Epilepsy & Behavior, 2016. **55**: p. 165-169.
36. Dressler, A., et al., *The ketogenic diet in infants - Advantages of early use*. Epilepsy Research, 2015. **116**: p. 53-58.
37. Hirano, Y., et al., *Ketogenic diet therapy can improve ACTH-resistant West syndrome in Japan*. Brain & Development, 2015. **37**(1): p. 18-22.
38. van der Louw, E., et al., *Concomitant lamotrigine use is associated with decreased efficacy of the ketogenic diet in childhood refractory epilepsy*. Seizure-European Journal of Epilepsy, 2015. **32**: p. 75-77.
39. Vehmeijer, F.O.L., et al., *Can we predict efficacy of the ketogenic diet in children with refractory epilepsy?* European Journal of Paediatric Neurology, 2015. **19**(6): p. 701-705.
40. Caraballo, R.H., et al., *Ketogenic diet in pediatric patients with refractory focal status epilepticus*. Epilepsy Research, 2014. **108**(10): p. 1912-1916.
41. Pires, M.E., et al., *Ketogenic diet for infantile spasms refractory to first-line treatments: An open prospective study*. Epilepsy Research, 2013. **105**(1-2): p. 189-194.
42. Jung, D.E., et al., *Safety and role of ketogenic parenteral nutrition for intractable childhood epilepsy*. Brain & Development, 2012. **34**(8): p. 620-624.
43. Kumada, T., et al., *Efficacy and tolerability of modified Atkins diet in Japanese children with medication-resistant epilepsy*. Brain & Development, 2012. **34**(1): p. 32-38.
44. Larson, A.M., H.H. Pfeifer, and E.A. Thiele, *Low glycemic index treatment for epilepsy in tuberous sclerosis complex*. Epilepsy Research, 2012. **99**(1-2): p. 180-182.
45. Sharma, S., et al., *Use of the modified Atkins diet in infantile spasms refractory to first-line treatment*. Seizure-European Journal of Epilepsy, 2012. **21**(1): p. 45-48.
46. Coppola, G., et al., *Ketogenic diet for the treatment of catastrophic epileptic encephalopathies in childhood*. European Journal of Paediatric Neurology, 2010. **14**(3): p. 229-234.

47. Tonekaboni, S.H., et al., *Efficacy of the Atkins Diet as Therapy for Intractable Epilepsy in Children*. Archives of Iranian Medicine, 2010. **13**(6): p. 492-497.
48. Villeneuve, N., et al., *The ketogenic diet improves recently worsened focal epilepsy*. Developmental Medicine and Child Neurology, 2009. **51**(4): p. 276-281.
49. Dahlin, M., et al., *Plasma phospholipid fatty acids are influenced by a ketogenic diet enriched with n-3 fatty acids in children with epilepsy*. Epilepsy Research, 2007. **73**(2): p. 199-207.
50. Eun, S.H., et al., *Ketogenic diet for treatment of infantile spasms*. Brain & Development, 2006. **28**(9): p. 566-571.
51. Dahlin, M., et al., *The ketogenic diet influences the levels of excitatory and inhibitory amino acids in the CSF in children with refractory epilepsy*. Epilepsy Research, 2005. **64**(3): p. 115-125.
52. Hosain, S.A., M. La Vega-Talbott, and G.E. Solomon, *Ketogenic diet in pediatric epilepsy patients with gastrostomy feeding*. Pediatric Neurology, 2005. **32**(2): p. 81-83.
53. Kang, H.C., et al., *Efficacy and safety of the ketogenic diet for intractable childhood epilepsy: Korean multicentric experience*. Epilepsia, 2005. **46**(2): p. 272-279.
54. Coppola, G., et al., *The ketogenic diet in children, adolescents and young adults with refractory epilepsy: an Italian multicentric experience*. Epilepsy Research, 2002. **48**(3): p. 221-227.
55. Takeoka, M., et al., *Concomitant treatment with topiramate and ketogenic diet in pediatric epilepsy*. Epilepsia, 2002. **43**(9): p. 1072-1075.
56. Maydell, B.V., et al., *Efficacy of the ketogenic diet in focal versus generalized seizures*. Pediatric Neurology, 2001. **25**(3): p. 208-212.
57. Nordli, D.R., et al., *Experience with the ketogenic diet in infants*. Pediatrics, 2001. **108**(1): p. 129-133.
58. Freeman, J.M., et al., *The efficacy of the ketogenic diet-1998: a prospective evaluation of intervention in 150 children*. Pediatrics, 1998. **102**(6): p. 1358-63.
59. Kossoff, E.H., et al., *Efficacy of the ketogenic diet for infantile spasms*. Pediatrics, 2002. **109**(5): p. 780-783.
60. Caraballo, R.H., et al., *Ketogenic diet in patients with Lennox-Gastaut syndrome*. Seizure-European Journal of Epilepsy, 2014. **23**(9): p. 751-755.
61. Zhang, Y.J., et al., *Therapeutic effects of the ketogenic diet in children with Lennox-Gastaut syndrome*. Epilepsy Research, 2016. **128**: p. 176-180.
62. Lemmon, M.E., et al., *Efficacy of the ketogenic diet in Lennox-Gastaut syndrome: a retrospective review of one institution's experience and summary of the literature*. Developmental Medicine and Child Neurology, 2012. **54**(5): p. 464-468.
63. Caraballo, R., et al., *Long-term follow-up of the ketogenic diet for refractory epilepsy: Multicenter Argentinean experience in 216 pediatric patients*. Seizure-European Journal of Epilepsy, 2011. **20**(8): p. 640-645.

64. Lambrechts, D., et al., *A randomized controlled trial of the ketogenic diet in refractory childhood epilepsy*. Acta Neurologica Scandinavica, 2017. **135**(2): p. 231-239.
65. El-Rashidy, O.F., et al., *Modified Atkins diet vs classic ketogenic formula in intractable epilepsy*. Acta Neurologica Scandinavica, 2013. **128**(6): p. 402-408.
66. Neal, E.G., et al., *The ketogenic diet for the treatment of childhood epilepsy: a randomised controlled trial*. Lancet Neurology, 2008. **7**(6): p. 500-506.
67. Lambrechts, D.A., et al., *The ketogenic diet as a treatment option in adults with chronic refractory epilepsy: efficacy and tolerability in clinical practice*. Epilepsy Behav, 2012. **23**(3): p. 310-4.
68. Sirven, J., et al., *The ketogenic diet for intractable epilepsy in adults: preliminary results*. Epilepsia, 1999. **40**(12): p. 1721-6.
69. Zamani, G.R., et al., *The effects of classic ketogenic diet on serum lipid profile in children with refractory seizures*. Acta Neurologica Belgica, 2016. **116**(4): p. 529-534.
70. Zhu, D.N., et al., *Ketogenic diet effects on neurobehavioral development of children with intractable epilepsy: A prospective study*. Epilepsy & Behavior, 2016. **55**: p. 87-91.
71. Hallbook, T., et al., *Effectiveness of the ketogenic diet used to treat resistant childhood epilepsy in Scandinavia*. European Journal of Paediatric Neurology, 2015. **19**(1): p. 29-36.
72. Bansal, S., et al., *The Ketogenic Diet: Initiation at Goal Calories Versus Gradual Caloric Advancement*. Pediatric Neurology, 2014. **50**(1): p. 26-30.
73. Kapetanakis, M., et al., *Effects of ketogenic diet on vascular function*. European Journal of Paediatric Neurology, 2014. **18**(4): p. 489-494.
74. Kayyali, H.R., et al., *Ketogenic Diet Efficacy in the Treatment of Intractable Epileptic Spasms*. Pediatric Neurology, 2014. **50**(3): p. 224-227.
75. Shull, S., et al., *Early Efficacy of the Ketogenic Diet Is Not Affected by Initial Body Mass Index Percentile*. Pediatric Neurology, 2014. **50**(5): p. 469-473.
76. Li, B.M., et al., *Effects of ketogenic diet on the clinical and electroencephalographic features of children with drug therapy-resistant epilepsy*. Experimental and Therapeutic Medicine, 2013. **5**(2): p. 611-615.
77. Suo, C.Q., et al., *Efficacy and safety of the ketogenic diet in Chinese children*. Seizure-European Journal of Epilepsy, 2013. **22**(3): p. 174-178.
78. Dahlin, M., J.E. Mansson, and P. Amark, *CSF levels of dopamine and serotonin, but not norepinephrine, metabolites are influenced by the ketogenic diet in children with epilepsy*. Epilepsy Research, 2012. **99**(1-2): p. 132-138.
79. Martins, L.D., et al., *Effect of the classic ketogenic diet on the treatment of refractory epileptic seizures*. Revista De Nutricao-Brazilian Journal of Nutrition, 2012. **25**(5): p. 565-573.
80. Miranda, M.J., et al., *Danish study of a Modified Atkins diet for medically intractable epilepsy in children: Can we achieve the same results as with the*

- classical ketogenic diet?* Seizure-European Journal of Epilepsy, 2011. **20**(2): p. 151-155.
81. Raju, K.N.V., et al., *Efficacy of 4:1 (classic) versus 2.5:1 ketogenic ratio diets in refractory epilepsy in young children: A randomized open labeled study.* Epilepsy Research, 2011. **96**(1-2): p. 96-100.
  82. Beniczky, S., et al., *Effectiveness of the ketogenic diet in a broad range of seizure types and EEG features for severe childhood epilepsies.* Acta Neurologica Scandinavica, 2010. **121**(1): p. 58-62.
  83. Hong, A.M., et al., *Infantile spasms treated with the ketogenic diet: Prospective single-center experience in 104 consecutive infants.* Epilepsia, 2010. **51**(8): p. 1403-1407.
  84. Lee, Y.J., et al., *Usefulness of liquid ketogenic milk for intractable childhood epilepsy.* e-SPEN, the European e-Journal of Clinical Nutrition and Metabolism, 2010. **5**(5): p. e203-e207.
  85. Alireza, M., et al., *Efficacy of the ketogenic diet as a therapy for intractable epilepsy in children.* Iranian Journal of Child Neurology, 2010. **4**.
  86. Neal, E.G., et al., *A randomized trial of classical and medium-chain triglyceride ketogenic diets in the treatment of childhood epilepsy.* Epilepsia, 2009. **50**(5): p. 1109-1117.
  87. Porta, N., et al., *Comparison of seizure reduction and serum fatty acid levels after receiving the ketogenic and modified Atkins diet.* Seizure-European Journal of Epilepsy, 2009. **18**(5): p. 359-364.
  88. Sharma, S., et al., *Seizure control and biochemical profile on the ketogenic diet in young children with refractory epilepsy-Indian experience.* Seizure-European Journal of Epilepsy, 2009. **18**(6): p. 446-449.
  89. Spulber, G., et al., *Growth dependence on insulin-like growth factor-1 during the ketogenic diet.* Epilepsia, 2009. **50**(2): p. 297-303.
  90. Jung, D.E., H.C. Kang, and H.D. Kim, *Long-term outcome of the ketogenic diet for intractable childhood epilepsy with focal malformation of cortical development.* Pediatrics, 2008. **122**(2): p. E330-E333.
  91. Kossoff, E.H., et al., *When do seizures usually improve with the ketogenic diet?* Epilepsia, 2008. **49**(2): p. 329-33.
  92. Remahl, S., M.G. Dahlin, and P.E. Amark, *Influence of the ketogenic diet on 24-hour electroencephalogram in children with epilepsy.* Pediatric Neurology, 2008. **38**(1): p. 38-43.
  93. Stainman, R.S., et al., *Decreased relative efficacy of the ketogenic diet for children with surgically approachable epilepsy.* Seizure-European Journal of Epilepsy, 2007. **16**(7): p. 615-619.
  94. Freitas, A., et al., *Ketogenic diet for the treatment of refractory epilepsy - A 10 year experience in children.* Arquivos De Neuro-Psiquiatria, 2007. **65**(2B): p. 381-384.
  95. Hallbook, T., et al., *Effects of ketogenic diet on epileptiform activity in children with therapy resistant epilepsy.* Epilepsy Research, 2007. **77**(2-3): p. 134-140.

96. Seo, J.H., et al., *Efficacy and tolerability of the ketogenic diet according to Lipid : Nonlipid ratios-comparison of 3 : 1 with 4 : 1 diet*. *Epilepsia*, 2007. **48**(4): p. 801-805.
97. Rizzutti, S., et al., *Is hospitalization really necessary during the introduction of the ketogenic diet?* *Journal of Child Neurology*, 2007. **22**(1): p. 33-37.
98. Kossoff, E.H., et al., *Tuberous sclerosis complex and the ketogenic diet*. *Epilepsia*, 2005. **46**(10): p. 1684-1686.
99. Mackay, M.T., et al., *The ketogenic diet in refractory childhood epilepsy*. *Journal of Paediatrics and Child Health*, 2005. **41**(7): p. 353-357.
100. Lyczkowski, D.A., et al., *Safety and tolerability of the ketogenic diet in pediatric epilepsy: Effects of valproate combination therapy*. *Epilepsia*, 2005. **46**(9): p. 1533-1538.
101. Peterson, S.J., et al., *Current research - Changes in growth and seizure reduction in children on the ketogenic diet as a treatment for intractable epilepsy*. *Journal of the American Dietetic Association*, 2005. **105**(5): p. 718-725.
102. Kim, D.W., et al., *Benefits of the nonfasting ketogenic diet compared with the initial fasting ketogenic diet*. *Pediatrics*, 2004. **114**(6): p. 1627-1630.
103. DiMario, F.J. and J. Holland, *The ketogenic diet: A review of the experience at Connecticut Children's Medical Center*. *Pediatric Neurology*, 2002. **26**(4): p. 288-292.
104. Kankirawatana, P., et al., *Ketogenic diet: an alternative treatment for refractory epilepsy in children*. *Journal of the Medical Association of Thailand = Chotmaihet thangphaet*, 2001. **84**(7): p. 1027-32.
105. Vining, E.P., et al., *A multicenter study of the efficacy of the ketogenic diet*. *Archives of neurology*, 1998. **55**(11): p. 1433-7.
106. Mady, M.A., et al., *The ketogenic diet: Adolescents can do it, too*. *Epilepsia*, 2003. **44**(6): p. 847-851.
107. Sharma, S., et al., *Use of the Modified Atkins Diet in Lennox Gastaut Syndrome*. *Journal of Child Neurology*, 2015. **30**(5): p. 576-579.
108. Cervenka, M.C., et al., *Establishing an Adult Epilepsy Diet Center: Experience, efficacy and challenges*. *Epilepsy Behav*, 2016. **58**: p. 61-8.
109. Vaccarezza, M.M., et al., *Treatment of refractory epilepsy with the modified Atkins diet*. *Arch Argent Pediatr*, 2014. **112**(4): p. 348-51.
110. Kossoff, E.H., B.J. Henry, and M.C. Cervenka, *Efficacy of dietary therapy for juvenile myoclonic epilepsy*. *Epilepsy Behav*, 2013. **26**(2): p. 162-4.
111. Cervenka, M.C., et al., *E-mail management of the modified Atkins Diet for adults with epilepsy is feasible and effective*. *Epilepsia*, 2012. **53**(4): p. 728-32.
112. Smith, M., et al., *Efficacy and tolerability of the modified Atkins diet in adults with pharmacoresistant epilepsy: a prospective observational study*. *Epilepsia*, 2011. **52**(4): p. 775-80.
113. Kossoff, E.H., et al., *A prospective study of the modified Atkins diet for intractable epilepsy in adults*. *Epilepsia*, 2008. **49**(2): p. 316-9.

114. Sharma, S., et al., *Evaluation of a simplified modified Atkins diet for use by parents with low levels of literacy in children with refractory epilepsy: A randomized controlled trial*. Epilepsy Research, 2016. **127**: p. 152-159.
115. Vaccarezza, M.M., et al., *Treatment of refractory epilepsy with the modified Atkins diet*. Archivos argentinos de pediatria, 2014. **112**(4): p. 348-51.
116. Sharma, S., et al., *Use of the modified Atkins diet for treatment of refractory childhood epilepsy: A randomized controlled trial*. Epilepsia, 2013. **54**(3): p. 481-486.
117. Chen, W. and E.H. Kossoff, *Long-Term Follow-Up of Children Treated With the Modified Atkins Diet*. Journal of Child Neurology, 2012. **27**(6): p. 754-758.
118. Barzegar, M., I. Poupak, and M. Ebrahimi-Mameghani, *Modified Atkins Diet for intractable childhood epilepsy*. Iranian Journal of Child Neurology, 2010. **4**.
119. Kang, H.C., et al., *Use of a modified atkins diet in intractable childhood epilepsy*. Epilepsia, 2007. **48**(1): p. 182-186.
120. Kossoff, E.H., et al., *A modified Atkins diet is effective for the treatment of intractable pediatric epilepsy*. Epilepsia, 2006. **47**(2): p. 421-424.
121. Weber, S., et al., *Modified Atkins diet to children and adolescents with medical intractable epilepsy*. Seizure-European Journal of Epilepsy, 2009. **18**(4): p. 237-240.
122. Kossoff, E.H., J.L. Borsage, and A.M. Comi, *A pilot study of the modified Atkins diet for Sturge-Weber syndrome*. Epilepsy Research, 2010. **92**(2-3): p. 240-243.
